# Supplementary material for: Recombination Modulates How Selection Affects Linked Sites in Drosophila
Source: PLoS Biol. 2012 Nov 13;10(11):e1001422. doi: 10.1371/journal.pbio.1001422 (PMC3496668; doi:10.1371/journal.pbio.1001422)
Supplement: Dataset S3 — Results of rare-events logistic regression for pairwise map comparisons; intervals condensed across all three maps. (XLS) [file pbio.1001422.s003.xls]

## Sheet: Mir vs Flg on CH2
	Term	Estimate	Std. Error	z value	Pr(>|z|)	Odds Ratio (Mir over Flg)	95% Odds Ratio CI		Variance + Bias^2	Benjamini & Hochberg Corrected p-values
	Species : Mir	0.249271	0.0612019	4.07292	4.64269e-05	1.28309	1.13805	1.44662
Difference Between Intervals Over Both Species (Main Effect)	Interval1	1.49119	0.168857	8.83108	1.03668e-18		3.19066	6.18513
	Interval2	-0.0426555	0.353755	-0.120579	0.904024		0.479019	1.91689
	Interval3	-0.676489	0.497557	-1.35962	0.17395		0.191724	1.34813
	Interval4	-0.311099	0.407368	-0.76368	0.445058		0.329711	1.62798
	Interval5	0.422811	0.279392	1.51333	0.130197		0.882676	2.63905
	Interval6	0.656629	0.252905	2.59635	0.00942197		1.17461	3.16554
	Interval7	-0.279543	0.407399	-0.686165	0.492609		0.34026	1.68028
	Interval8	1.18398	0.194196	6.09684	1.08183e-09		2.23303	4.7808
	Interval9	-0.168853	0.377664	-0.447098	0.654805		0.402897	1.77069
	Interval10	1.94212	0.139111	13.961	2.69729e-44		5.30932	9.15937
	Interval11	0.0665888	0.333974	0.199383	0.841963		0.555437	2.05685
	Interval12	-0.170444	0.377662	-0.451314	0.651763		0.402258	1.76787
	Interval13	0.0697799	0.333978	0.208936	0.834498		0.557208	2.06344
	Interval14	-0.728798	0.353206	-2.06338	0.0390764		0.241453	0.964144
	Interval15	-0.913718	0.573746	-1.59255	0.111262		0.130255	1.2347
	Interval16	-0.46554	0.445649	-1.04463	0.296193		0.262104	1.50371
	Interval17	1.95719	0.139155	14.0648	6.24946e-45		5.38946	9.29925
	Interval18	0.345172	0.290409	1.18857	0.234607		0.799292	2.49521
	Interval19	2.48515	0.113041	21.9846	4.04409e-107		9.61756	14.9799
	Interval20	0.355631	0.290423	1.22453	0.220753		0.807673	2.52152
	Interval21	-1.24065	0.701718	-1.76802	0.0770576		0.0730932	1.14421
	Interval22	0.0729812	0.333981	0.218519	0.827025		0.558991	2.07007
	Interval23	-0.676489	0.497557	-1.35962	0.17395		0.191724	1.34813
	Interval24	-0.0442498	0.353753	-0.125087	0.900455		0.478258	1.91383
	Interval25	-0.045046	0.353752	-0.127338	0.898673		0.477878	1.9123
	Interval26	-0.169649	0.377663	-0.449207	0.653283		0.402577	1.76928
	Interval27	-0.476753	0.44564	-1.06982	0.284701		0.259187	1.48691
	Interval28	0.0689812	0.333977	0.206545	0.836365		0.556764	2.06179
	Interval29	-0.31269	0.407366	-0.76759	0.442731		0.329187	1.62539
	Interval30	-0.678078	0.497555	-1.36282	0.172939		0.19142	1.34599
	Interval31	0.42121	0.27939	1.50761	0.131655		0.881268	2.63482
	Interval32	-0.920116	0.573742	-1.60371	0.108778		0.129426	1.22681
	Interval33	0.263551	0.302916	0.870046	0.384275		0.718806	2.35671
	Interval34	-0.920116	0.573742	-1.60371	0.108778		0.129426	1.22681
	Interval35	-0.473562	0.445642	-1.06265	0.28794		0.260014	1.49167
	Interval36	-0.0426555	0.353755	-0.120579	0.904024		0.479019	1.91689
	Interval37	2.09131	0.131002	15.9639	2.2786e-57		6.26231	10.4654
	Interval38	0.628861	0.252861	2.48699	0.012883		1.14254	3.07858
	Interval39	-0.290172	0.407388	-0.712275	0.476295		0.33667	1.66248
	Interval40	-0.476753	0.44564	-1.06982	0.284701		0.259187	1.48691
	Interval41	0.566406	0.260805	2.17176	0.0298738		1.05678	2.93757
	Interval42	-0.0386587	0.353759	-0.10928	0.912981		0.480933	1.92458
	Interval43	0.578562	0.260824	2.21821	0.0265405		1.06967	2.97361
	Interval44	1.33332	0.182632	7.30061	2.86472e-13		2.65214	5.42643
	Interval45	1.43867	0.173047	8.31377	9.2705e-17		3.00266	5.91707
	Interval46	-1.00085	0.40689	-2.45977	0.0139028		0.16557	0.815993
	Interval47	-0.916922	0.573744	-1.59814	0.110012		0.129839	1.23074
	Interval48	0.422811	0.279392	1.51333	0.130197		0.882676	2.63905
	Interval49	0.894966	0.222184	4.02804	5.62426e-05		1.58326	3.78273
	Interval50	-0.31269	0.407366	-0.76759	0.442731		0.329187	1.62539
	Interval51	1.10719	0.200996	5.50853	3.61844e-08		2.04059	4.48683
	Interval52	-0.164062	0.377669	-0.434408	0.663993		0.404828	1.77921
	Interval53	-0.307108	0.407372	-0.753877	0.450923		0.331027	1.63451
	Interval54	0.742367	0.239033	3.10571	0.00189822		1.31503	3.35641
	Interval55	-0.672505	0.49756	-1.35161	0.176501		0.192488	1.35352
	Interval56	-1.6846	0.990661	-1.70048	0.0890412		0.0266147	1.29317
	Interval57	0.691683	0.245644	2.81579	0.00486571		1.23395	3.23214
	Interval58	-1.6822	0.990667	-1.69805	0.0894985		0.0266782	1.29629
	Interval59	-0.468757	0.445647	-1.05186	0.292865		0.261264	1.49887
	Interval60	1.76731	0.150821	11.718	1.03126e-31		4.35666	7.86895
	Interval61	-1.24781	0.701714	-1.77823	0.0753655		0.0725723	1.13604
	Interval62	0.261149	0.302913	0.862126	0.388618		0.717086	2.35104
	Interval63	0.346774	0.290411	1.19408	0.232446		0.80057	2.49922
	Interval64	-1.68858	0.990652	-1.70451	0.0882855		0.0265094	1.28801
	Interval65	-0.922504	0.57374	-1.60788	0.107862		0.129117	1.22388
	Interval66	-0.677284	0.497556	-1.36122	0.173444		0.191572	1.34706
	Interval67	-1.68539	0.990659	-1.70129	0.0888894		0.0265935	1.29214
	Interval68	-0.305507	0.407373	-0.749945	0.453288		0.331556	1.63713
	Interval69	1.47062	0.170921	8.60411	7.69136e-18		3.11309	6.08376
	Interval70	-0.288544	0.40739	-0.708276	0.478774		0.337217	1.66519
	Interval71	1.12351	0.201029	5.58882	2.28614e-08		2.07404	4.56095
	Interval72	0.344372	0.290408	1.18582	0.235692		0.798655	2.49321
	Interval73	1.2144	0.191057	6.35624	2.06753e-10		2.31621	4.89824
	Interval74	-0.169649	0.377663	-0.449207	0.653283		0.402577	1.76928
	Interval75	-0.921709	0.573741	-1.60649	0.108166		0.12922	1.22486
	Interval76	-0.0410587	0.353756	-0.116065	0.907601		0.479783	1.91996
	Interval77	0.168786	0.317267	0.532	0.594726		0.635682	2.20478
	Interval78	-0.92568	0.573738	-1.61342	0.106653		0.128708	1.21999
	Interval79	1.30789	0.185328	7.05716	1.69941e-12		2.5719	5.31818
	Interval80	-0.288544	0.40739	-0.708276	0.478774		0.337217	1.66519
	Interval81	0.343573	0.290407	1.18308	0.236779		0.798018	2.49121
	Interval82	1.14503	0.197497	5.79772	6.72225e-09		2.13387	4.62801
	Interval83	-1.36585	0.497165	-2.74728	0.00600919		0.0962992	0.676104
	Interval84	-0.473562	0.445642	-1.06265	0.28794		0.260014	1.49167
	Interval85	0.494171	0.26959	1.83305	0.0667951		0.966355	2.78032
	Interval86	0.741562	0.239031	3.10236	0.00191982		1.31398	3.3537
	Interval87	0.938792	0.217358	4.3191	1.56664e-05		1.66991	3.91499
	Interval88	-0.479934	0.445637	-1.07696	0.281497		0.258365	1.48218
	Interval89	-0.651528	0.497576	-1.3094	0.190398		0.196562	1.38226
	Interval90	-0.446019	0.445667	-1.00079	0.316928		0.267262	1.5334
	Interval91	-1.69175	0.990644	-1.70773	0.0876868		0.0264258	1.28391
	Interval92	-0.0713094	0.252074	-0.282891	0.77726		0.568148	1.52616
	Interval93	-0.736002	0.353202	-2.0838	0.0371782		0.239722	0.957215
	Interval94	-0.625961	0.333389	-1.87757	0.0604405		0.278203	1.02786
	Interval95	0.84979	0.227375	3.73739	0.000185938		1.49801	3.65262
	Interval96	-0.668505	0.497563	-1.34356	0.179091		0.193258	1.35896
Difference In Each Interval Between the Species (Interaction effect)	Interval14	-1.8269	1.04651	-1.74571	0.0808613	0.160912	0.0206912	1.25139	4.43272	0.435961
	Interval59	-1.39575	1.08635	-1.2848	0.198861	0.247648	0.0294519	2.08236	3.12827	0.621103
	Interval83	-1.18727	1.10349	-1.07592	0.281963	0.305053	0.0350804	2.6527	2.6273	0.668849
	Interval30	-1.18386	1.10866	-1.06783	0.285599	0.306096	0.0348454	2.68886	2.63065	0.668849
	Interval22	-1.16964	0.663816	-1.76199	0.0780707	0.310479	0.0845242	1.14047	1.80871	0.435961
	Interval73	-1.12697	0.358037	-3.14764	0.00164593	0.324013	0.160619	0.653626	1.39825	0.08245
	Interval5	-1.07359	0.525914	-2.04139	0.0412125	0.341778	0.121921	0.958101	1.42919	0.39964
	Interval15	-0.951641	1.14488	-0.831217	0.405851	0.386107	0.040942	3.64121	2.21636	0.758396
	Interval84	-0.942651	0.831226	-1.13405	0.256774	0.389594	0.0763938	1.98685	1.57953	0.668849
	Interval47	-0.941579	1.14489	-0.822422	0.410837	0.390012	0.0413553	3.6781	2.19733	0.758396
	Interval9	-0.928661	0.686831	-1.35209	0.176345	0.395082	0.102812	1.5182	1.33415	0.610754
	Interval31	-0.906337	0.493901	-1.83506	0.0664968	0.404001	0.15345	1.06365	1.06538	0.430033
	Interval71	-0.840914	0.34414	-2.44352	0.0145447	0.431316	0.219714	0.846708	0.825569	0.200929
	Interval63	-0.831902	0.500218	-1.66308	0.0962967	0.435221	0.163274	1.16012	0.942278	0.491637
	Interval68	-0.792006	0.703605	-1.12564	0.260318	0.452935	0.114055	1.79869	1.12233	0.668849
	Interval54	-0.745699	0.397149	-1.87763	0.060432	0.474403	0.217815	1.03325	0.713794	0.430033
	Interval28	-0.721479	0.556834	-1.29568	0.195086	0.486033	0.163184	1.44761	0.830597	0.621103
	Interval85	-0.70642	0.444697	-1.58854	0.112164	0.493407	0.206382	1.17961	0.696785	0.518756
	Interval72	-0.687254	0.476337	-1.44279	0.14908	0.502955	0.197726	1.27937	0.699215	0.535656
	Interval41	-0.669543	0.423665	-1.58036	0.114025	0.511943	0.223147	1.1745	0.62778	0.518756
	Interval93	-0.610286	0.568203	-1.07406	0.282795	0.543196	0.178358	1.65432	0.695304	0.668849
	Interval29	-0.536235	0.642994	-0.833966	0.4043	0.584946	0.165878	2.06274	0.70099	0.758396
	Interval79	-0.496169	0.282117	-1.75874	0.0786224	0.608859	0.350247	1.05842	0.325773	0.435961
	Interval69	-0.495658	0.261063	-1.89861	0.0576154	0.60917	0.365188	1.01616	0.313831	0.430033
	Interval6	-0.474698	0.385017	-1.23293	0.217603	0.622073	0.292488	1.32304	0.373576	0.639612
	Interval7	-0.362615	0.603744	-0.600611	0.548099	0.695854	0.213109	2.27214	0.495996	0.830714
	Interval19	-0.356759	0.165642	-2.1538	0.031256	0.699941	0.5059	0.968409	0.154714	0.337344
	Interval74	-0.315478	0.555436	-0.567984	0.570046	0.72944	0.24558	2.16664	0.408035	0.837727
	Interval92	-0.301473	0.368412	-0.818303	0.413184	0.739728	0.359313	1.5229	0.226613	0.758396
	Interval76	-0.296657	0.517406	-0.573354	0.566405	0.743299	0.269612	2.04922	0.355714	0.837727
	Interval49	-0.258332	0.321844	-0.802662	0.42217	0.772339	0.411007	1.45133	0.170319	0.758396
	Interval57	-0.238573	0.352434	-0.676931	0.49845	0.787751	0.394813	1.57176	0.181127	0.801125
	Interval1	-0.234293	0.24328	-0.963062	0.335516	0.79113	0.491093	1.27448	0.114078	0.704058
	Interval90	-0.205621	0.630193	-0.326283	0.74421	0.814141	0.236738	2.79983	0.439424	0.906223
	Interval25	-0.161137	0.500222	-0.322131	0.747353	0.851175	0.319316	2.26891	0.276188	0.906223
	Interval86	-0.120669	0.333677	-0.361634	0.717625	0.886327	0.460853	1.70461	0.125901	0.903095
	Interval33	-0.0911682	0.419556	-0.217297	0.827977	0.912864	0.401119	2.07749	0.184339	0.933907
	Interval17	-0.0824313	0.192682	-0.42781	0.668789	0.920875	0.631228	1.34343	0.0439213	0.864981
	Interval42	-0.0601567	0.486438	-0.123668	0.901578	0.941617	0.362919	2.44309	0.240241	0.970417
	Interval26	-0.0451888	0.517401	-0.087338	0.930403	0.955817	0.3467	2.63509	0.269746	0.970417
	Interval4	-0.0300638	0.555437	-0.0541263	0.956835	0.970384	0.326697	2.88231	0.309415	0.9713
	Interval44	-0.0131677	0.2486	-0.0529673	0.957758	0.986919	0.606274	1.60655	0.0619754	0.9713
	Interval13	0.0185157	0.450809	0.0410722	0.967238	1.01869	0.421022	2.46478	0.203572	0.9713
	Interval97	0.0200655	0.541299	0.0370691	0.797337	1.02027	0.353143	2.94766	0.293407	0.931656
	Interval23	0.0239906	0.667897	0.0359196	0.971346	1.02428	0.276626	3.79266	0.446662	0.9713
	Interval11	0.0417598	0.450826	0.0926295	0.926198	1.04264	0.430909	2.52282	0.204988	0.970417
	Interval60	0.0560463	0.203062	0.276005	0.782544	1.05765	0.71038	1.57467	0.0443755	0.92564
	Interval45	0.0565076	0.233218	0.242295	0.808551	1.05813	0.669918	1.67132	0.0575836	0.931656
	Interval32	0.0694739	0.75939	0.0914866	0.927106	1.07194	0.241973	4.74873	0.581499	0.970417
	Interval53	0.0896888	0.539467	0.166255	0.867957	1.09383	0.379969	3.14887	0.299068	0.947112
	Interval43	0.0975288	0.345919	0.281941	0.777989	1.10244	0.559633	2.17174	0.129172	0.92564
	Interval70	0.107891	0.539509	0.199979	0.841497	1.11393	0.386916	3.20698	0.302711	0.938224
	Interval10	0.124679	0.186513	0.668472	0.503832	1.13278	0.78593	1.63272	0.0503321	0.801125
	Interval40	0.135591	0.584086	0.232142	0.816428	1.14521	0.364504	3.59808	0.359542	0.931656
	Interval61	0.149442	0.906372	0.164879	0.869039	1.16119	0.196509	6.86153	0.843842	0.947112
	Interval2	0.174168	0.465691	0.373999	0.708405	1.19026	0.477789	2.96513	0.247202	0.903095
	Interval39	0.184451	0.526722	0.350187	0.726198	1.20256	0.428303	3.37645	0.311458	0.903095
	Interval8	0.187693	0.2547	0.736918	0.461172	1.20646	0.732334	1.98755	0.1001	0.784849
	Interval62	0.190228	0.394491	0.482212	0.629655	1.20953	0.558236	2.62067	0.19181	0.848346
	Interval50	0.254534	0.526744	0.483222	0.628938	1.28986	0.459377	3.62173	0.342247	0.848346
	Interval35	0.256143	0.56892	0.450227	0.652547	1.29194	0.423611	3.94018	0.389279	0.855304
	Interval37	0.259264	0.17201	1.50726	0.131743	1.29598	0.92508	1.81558	0.0968055	0.518756
	Interval27	0.261916	0.568919	0.460374	0.645248	1.29942	0.426064	3.96299	0.392269	0.855304
	Interval20	0.265262	0.372223	0.712643	0.476066	1.30377	0.628578	2.70423	0.208914	0.7857
	Interval38	0.265373	0.325232	0.815949	0.41453	1.30392	0.689297	2.46657	0.176199	0.758396
	Interval36	0.291876	0.450703	0.647601	0.517243	1.33894	0.553495	3.23897	0.288325	0.809168
	Interval87	0.29496	0.2791	1.05683	0.29059	1.34307	0.777186	2.32099	0.164898	0.668849
	Interval55	0.330482	0.624602	0.529109	0.59673	1.39164	0.409124	4.73367	0.499346	0.844593
	Interval80	0.375977	0.507596	0.740701	0.458875	1.45641	0.53853	3.93876	0.399013	0.784849
	Interval82	0.376352	0.250961	1.49965	0.133706	1.45696	0.890893	2.3827	0.204622	0.518756
	Interval51	0.387093	0.254645	1.52013	0.128479	1.47269	0.894034	2.42589	0.214685	0.518756
	Interval94	0.391792	0.417845	0.937649	0.348425	1.47963	0.652343	3.35606	0.328096	0.704058
	Interval78	0.440553	0.703601	0.62614	0.531223	1.55357	0.391212	6.16946	0.689141	0.817879
	Interval48	0.441956	0.348624	1.26772	0.204899	1.55575	0.785569	3.08102	0.316864	0.621103
	Interval46	0.477717	0.499404	0.956574	0.338782	1.61239	0.605855	4.29113	0.477618	0.704058
	Interval52	0.485507	0.463944	1.04648	0.295341	1.625	0.654539	4.03432	0.450962	0.668849
	Interval24	0.506941	0.434762	1.16602	0.243606	1.66021	0.708085	3.89259	0.446007	0.668849
	Interval95	0.520117	0.280816	1.85216	0.0640024	1.68222	0.970172	2.91689	0.349379	0.430033
	Interval16	0.552111	0.538786	1.02473	0.30549	1.73691	0.604164	4.99347	0.595116	0.673489
	Interval58	0.584687	1.14478	0.51074	0.609533	1.79443	0.190313	16.9194	1.65239	0.844593
	Interval21	0.58987	0.831224	0.70964	0.477928	1.80375	0.353692	9.19877	1.03888	0.7857
	Interval64	0.591064	1.14477	0.516317	0.605633	1.80591	0.191535	17.0272	1.65986	0.844593
	Interval91	0.605435	1.14477	0.528871	0.596895	1.83205	0.194308	17.2736	1.67704	0.844593
	Interval34	0.703556	0.673983	1.04388	0.296542	2.02093	0.539318	7.57279	0.949244	0.668849
	Interval75	0.709459	0.673984	1.05263	0.292508	2.03289	0.542509	7.61766	0.957588	0.668849
	Interval3	0.765648	0.582453	1.31452	0.18867	2.15039	0.68663	6.73458	0.925468	0.621103
	Interval96	0.840024	0.576053	1.45824	0.144774	2.31642	0.748982	7.16414	1.03748	0.535656
	Interval67	0.840772	1.10856	0.758436	0.44819	2.31816	0.263948	20.3595	1.9358	0.784849
	Interval18	0.953103	0.336876	2.82924	0.00466582	2.59375	1.34021	5.01975	1.02189	0.08245
	Interval81	0.975699	0.335832	2.90532	0.00366876	2.65302	1.37365	5.12396	1.06477	0.08245
	Interval65	1.00907	0.648741	1.55544	0.119842	2.74306	0.76916	9.78261	1.4391	0.518756
	Interval56	1.0321	1.08625	0.950151	0.342036	2.80695	0.333889	23.5976	2.24516	0.704058
	Interval89	1.04045	0.561721	1.85226	0.0639891	2.83049	0.941273	8.51153	1.39807	0.430033
	Interval77	1.06585	0.362369	2.94133	0.00326807	2.9033	1.42704	5.90671	1.26734	0.08245
	Interval12	1.18992	0.424595	2.80248	0.0050712	3.28681	1.43005	7.55436	1.59619	0.08245
	Interval66	1.30427	0.549337	2.37426	0.0175842	3.68499	1.25554	10.8154	2.00289	0.2134
	Interval88	1.45227	0.487371	2.9798	0.00288435	4.27279	1.64382	11.1063	2.34661	0.08245

## Sheet: Pp vs Flg on CH2
	Term	Estimate	Std. Error	z value	Pr(>|z|)	Odds Ratio (Pp over Mir)	95% Odds Ratio CI		Variance + Bias^2	Benjamini & Hochberg Corrected p-values
	Species : Pp	-0.0213435	0.0612263	-0.348601	0.727389	0.978883	0.868188	1.10369
Difference Between Intervals Over Both Species (Main Effect)	Interval1	1.49119	0.168858	8.83102	1.03723e-18		3.19066	6.18514
	Interval2	-0.0426555	0.353755	-0.120579	0.904024		0.479019	1.91689
	Interval3	-0.676489	0.497557	-1.35962	0.17395		0.191724	1.34814
	Interval4	-0.311099	0.407368	-0.763679	0.445059		0.32971	1.62799
	Interval5	0.422811	0.279392	1.51332	0.130198		0.882675	2.63905
	Interval6	0.656629	0.252905	2.59634	0.00942218		1.17461	3.16554
	Interval7	-0.279543	0.407399	-0.686164	0.49261		0.34026	1.68028
	Interval8	1.18398	0.194197	6.09681	1.08203e-09		2.23303	4.78081
	Interval9	-0.168853	0.377664	-0.447097	0.654805		0.402897	1.77069
	Interval10	1.94212	0.139112	13.9608	2.70248e-44		5.30931	9.1594
	Interval11	0.0665888	0.333974	0.199383	0.841963		0.555436	2.05686
	Interval12	-0.170444	0.377663	-0.451314	0.651764		0.402257	1.76787
	Interval13	0.0697799	0.333978	0.208935	0.834499		0.557208	2.06345
	Interval14	-0.728798	0.353206	-2.06338	0.0390767		0.241453	0.964145
	Interval15	-0.913718	0.573746	-1.59255	0.111262		0.130255	1.2347
	Interval16	-0.46554	0.44565	-1.04463	0.296193		0.262104	1.50371
	Interval17	1.95719	0.139157	14.0647	6.26165e-45		5.38945	9.29928
	Interval18	0.345172	0.290409	1.18857	0.234608		0.799291	2.49521
	Interval19	2.48515	0.113042	21.9843	4.0733e-107		9.61752	14.9799
	Interval20	0.355631	0.290424	1.22453	0.220754		0.807672	2.52152
	Interval21	-1.24065	0.70172	-1.76801	0.0770584		0.0730929	1.14422
	Interval22	0.0729812	0.333982	0.218518	0.827025		0.55899	2.07008
	Interval23	-0.676489	0.497557	-1.35962	0.17395		0.191724	1.34814
	Interval24	-0.0442498	0.353753	-0.125087	0.900455		0.478257	1.91383
	Interval25	-0.045046	0.353752	-0.127338	0.898673		0.477878	1.9123
	Interval26	-0.169649	0.377664	-0.449206	0.653283		0.402577	1.76928
	Interval27	-0.476753	0.44564	-1.06982	0.284702		0.259186	1.48691
	Interval28	0.0689812	0.333977	0.206545	0.836366		0.556764	2.06179
	Interval29	-0.31269	0.407367	-0.767589	0.442732		0.329187	1.62539
	Interval30	-0.678078	0.497556	-1.36282	0.17294		0.19142	1.34599
	Interval31	0.42121	0.27939	1.5076	0.131656		0.881267	2.63482
	Interval32	-0.920116	0.573742	-1.60371	0.108778		0.129426	1.22681
	Interval33	0.263551	0.302917	0.870044	0.384276		0.718805	2.35671
	Interval34	-0.920116	0.573742	-1.60371	0.108778		0.129426	1.22681
	Interval35	-0.473562	0.445643	-1.06265	0.287941		0.260013	1.49167
	Interval36	-0.0426555	0.353755	-0.120579	0.904024		0.479019	1.91689
	Interval37	2.09131	0.131004	15.9638	2.28506e-57		6.26229	10.4655
	Interval38	0.628861	0.252861	2.48698	0.0128833		1.14254	3.07858
	Interval39	-0.290172	0.407389	-0.712274	0.476295		0.336669	1.66248
	Interval40	-0.476753	0.44564	-1.06982	0.284702		0.259186	1.48691
	Interval41	0.566406	0.260806	2.17175	0.0298743		1.05678	2.93758
	Interval42	-0.0386587	0.35376	-0.10928	0.912981		0.480933	1.92458
	Interval43	0.578562	0.260824	2.2182	0.0265409		1.06967	2.97361
	Interval44	1.33332	0.182633	7.30057	2.86561e-13		2.65213	5.42644
	Interval45	1.43867	0.173048	8.31372	9.27462e-17		3.00266	5.91709
	Interval46	-1.00085	0.406891	-2.45976	0.0139029		0.16557	0.815993
	Interval47	-0.916922	0.573744	-1.59814	0.110012		0.129839	1.23074
	Interval48	0.422811	0.279392	1.51332	0.130198		0.882675	2.63905
	Interval49	0.894966	0.222185	4.02803	5.62463e-05		1.58326	3.78274
	Interval50	-0.31269	0.407367	-0.767589	0.442732		0.329187	1.62539
	Interval51	1.10719	0.200997	5.5085	3.61897e-08		2.04059	4.48684
	Interval52	-0.164062	0.377669	-0.434407	0.663993		0.404828	1.77921
	Interval53	-0.307108	0.407372	-0.753876	0.450924		0.331026	1.63451
	Interval54	0.742367	0.239033	3.1057	0.00189828		1.31503	3.35641
	Interval55	-0.672505	0.49756	-1.3516	0.176502		0.192488	1.35353
	Interval56	-1.6846	0.99101	-1.69988	0.0891538		0.0265965	1.29406
	Interval57	0.691683	0.245645	2.81578	0.00486584		1.23395	3.23215
	Interval58	-1.6822	0.991011	-1.69746	0.0896099		0.0266602	1.29716
	Interval59	-0.468757	0.445647	-1.05186	0.292866		0.261264	1.49887
	Interval60	1.76732	0.150822	11.7179	1.03245e-31		4.35665	7.86897
	Interval61	-1.24781	0.701716	-1.77823	0.0753664		0.072572	1.13604
	Interval62	0.261149	0.302913	0.862124	0.388619		0.717085	2.35104
	Interval63	0.346774	0.290412	1.19408	0.232447		0.800569	2.49923
	Interval64	-1.68858	0.991009	-1.7039	0.0884001		0.0264909	1.28891
	Interval65	-0.922504	0.57374	-1.60788	0.107862		0.129117	1.22388
	Interval66	-0.677284	0.497556	-1.36122	0.173444		0.191572	1.34706
	Interval67	-1.68539	0.99101	-1.70068	0.0890024		0.0265753	1.29303
	Interval68	-0.305507	0.407374	-0.749944	0.453288		0.331556	1.63713
	Interval69	1.47062	0.170922	8.60405	7.69511e-18		3.11308	6.08377
	Interval70	-0.288544	0.40739	-0.708275	0.478775		0.337217	1.66519
	Interval71	1.12351	0.20103	5.5888	2.28648e-08		2.07404	4.56096
	Interval72	0.344372	0.290408	1.18582	0.235693		0.798654	2.49321
	Interval73	1.2144	0.191058	6.35621	2.06798e-10		2.31621	4.89825
	Interval74	-0.169649	0.377664	-0.449206	0.653283		0.402577	1.76928
	Interval75	-0.921709	0.573741	-1.60649	0.108166		0.12922	1.22486
	Interval76	-0.0410587	0.353757	-0.116065	0.907601		0.479783	1.91996
	Interval77	0.168786	0.317268	0.531999	0.594727		0.635681	2.20479
	Interval78	-0.92568	0.573738	-1.61342	0.106654		0.128708	1.22
	Interval79	1.30789	0.185329	7.05712	1.69989e-12		2.5719	5.31819
	Interval80	-0.288544	0.40739	-0.708275	0.478775		0.337217	1.66519
	Interval81	0.343573	0.290407	1.18307	0.23678		0.798017	2.49122
	Interval82	1.14503	0.197498	5.79769	6.72338e-09		2.13387	4.62801
	Interval83	-1.36585	0.497167	-2.74727	0.00600936		0.0962989	0.676107
	Interval84	-0.473562	0.445643	-1.06265	0.287941		0.260013	1.49167
	Interval85	0.494171	0.26959	1.83305	0.0667958		0.966353	2.78033
	Interval86	0.741562	0.239032	3.10235	0.00191989		1.31398	3.3537
	Interval87	0.938792	0.217359	4.31909	1.56676e-05		1.66991	3.915
	Interval88	-0.479934	0.445637	-1.07696	0.281497		0.258365	1.48218
	Interval89	-0.651528	0.497577	-1.3094	0.190398		0.196562	1.38226
	Interval90	-0.446019	0.445667	-1.00079	0.316929		0.267262	1.5334
	Interval91	-1.69175	0.991007	-1.7071	0.087803		0.026407	1.28483
	Interval92	-0.0713094	0.252074	-0.28289	0.777261		0.568147	1.52616
	Interval93	-0.736002	0.353202	-2.0838	0.0371785		0.239721	0.957216
	Interval94	-0.625961	0.33339	-1.87756	0.0604409		0.278203	1.02786
	Interval95	0.84979	0.227376	3.73738	0.000185949		1.498	3.65263
	Interval96	-0.668505	0.497563	-1.34356	0.179092		0.193258	1.35896
Difference In Each Interval Between the Species (Interaction effect)	Interval1	-1.41631	0.359108	-3.94397	8.01441e-05	0.242607	0.120012	0.490437	2.13489	0.0097
	Interval41	-1.90664	0.748474	-2.54737	0.0108538	0.148579	0.0342643	0.644274	4.1955	0.24056
	Interval92	-1.39304	0.557265	-2.49978	0.0124269	0.248319	0.0833022	0.740224	2.25111	0.24056
	Interval95	-1.11158	0.440588	-2.52295	0.0116376	0.329039	0.138743	0.780338	1.42973	0.24056
	Interval51	0.666271	0.246453	2.70345	0.00686245	1.94696	1.20108	3.15604	0.504656	0.24056
	Interval16	1.18089	0.502666	2.34925	0.0188111	3.25727	1.21612	8.72434	1.64718	0.303933
	Interval71	-0.722172	0.335975	-2.14948	0.0315963	0.485696	0.251407	0.938323	0.634411	0.437886
	Interval82	0.486288	0.248869	1.95399	0.0507027	1.62627	0.998505	2.64871	0.298412	0.546433
	Interval80	0.934695	0.47211	1.97982	0.0477234	2.54644	1.0094	6.42394	1.09654	0.546433
	Interval89	1.06004	0.565733	1.87375	0.0609651	2.88649	0.952376	8.74846	1.44374	0.5917
	Interval93	-1.74141	1.05169	-1.65582	0.0977584	0.175273	0.0223098	1.377	4.13857	0.679388
	Interval4	-1.46447	1.07137	-1.36691	0.171653	0.2312	0.0283151	1.88781	3.29252	0.679388
	Interval94	-1.08405	0.663149	-1.6347	0.102111	0.338222	0.0921974	1.24076	1.61493	0.679388
	Interval14	-0.98263	0.673329	-1.45936	0.144466	0.374325	0.100023	1.40087	1.41893	0.679388
	Interval5	-0.682467	0.469553	-1.45344	0.146101	0.505369	0.201334	1.26853	0.686241	0.679388
	Interval6	-0.680844	0.418675	-1.62619	0.10391	0.506189	0.222807	1.15	0.638838	0.679388
	Interval69	-0.38321	0.258283	-1.48368	0.137893	0.68167	0.410884	1.13091	0.21356	0.679388
	Interval49	0.419263	0.282615	1.48351	0.137938	1.52084	0.874011	2.64637	0.255653	0.679388
	Interval81	0.501064	0.362446	1.38245	0.166833	1.65048	0.811128	3.35838	0.382432	0.679388
	Interval18	0.51465	0.362463	1.41987	0.155646	1.67305	0.822196	3.40443	0.396243	0.679388
	Interval70	0.689173	0.488295	1.41138	0.158131	1.99207	0.764995	5.1874	0.713391	0.679388
	Interval23	0.842843	0.582328	1.44737	0.147793	2.32296	0.741916	7.27327	1.04949	0.679388
	Interval78	0.900042	0.663704	1.35609	0.175071	2.45971	0.669772	9.03315	1.25058	0.679388
	Interval32	0.999987	0.655461	1.52562	0.127104	2.71825	0.752227	9.82264	1.4296	0.679388
	Interval15	1.08507	0.648638	1.67284	0.0943582	2.95964	0.830057	10.5529	1.59811	0.679388
	Interval90	-1.33736	1.08651	-1.23088	0.218368	0.262537	0.0312129	2.20824	2.96905	0.724561
	Interval87	-0.399771	0.333126	-1.20006	0.230116	0.670474	0.348995	1.28808	0.270789	0.724561
	Interval19	-0.201956	0.16312	-1.23808	0.215687	0.817131	0.593527	1.12497	0.0673945	0.724561
	Interval79	0.279863	0.241171	1.16044	0.245871	1.32295	0.824621	2.12242	0.136487	0.724561
	Interval33	0.456175	0.381878	1.19456	0.232261	1.57803	0.74654	3.33561	0.353926	0.724561
	Interval77	0.477365	0.396964	1.20254	0.229155	1.61182	0.740311	3.50929	0.385457	0.724561
	Interval97	0.838773	0.547219	1.53279	0.24647	2.31353	0.791539	6.76202	1.00299	0.724561
	Interval58	1.29464	1.07138	1.20839	0.226898	3.64968	0.446971	29.801	2.82395	0.724561
	Interval57	-0.422694	0.380103	-1.11205	0.266116	0.655279	0.311083	1.38031	0.323148	0.731957
	Interval45	0.254857	0.227327	1.1211	0.262244	1.29028	0.826378	2.01459	0.116629	0.731957
	Interval63	0.402616	0.372066	1.08211	0.279204	1.49573	0.721348	3.10144	0.300533	0.731957
	Interval66	0.655921	0.599076	1.09489	0.273566	1.92692	0.595551	6.23457	0.789124	0.731957
	Interval8	-0.30355	0.291151	-1.04259	0.29714	0.738193	0.417193	1.30618	0.176911	0.73332
	Interval62	0.405971	0.385607	1.05281	0.292428	1.50076	0.704816	3.19556	0.313506	0.73332
	Interval21	0.836616	0.811263	1.03125	0.302423	2.30854	0.470735	11.3214	1.35807	0.73332
	Interval46	-0.709157	0.702978	-1.00879	0.313075	0.492059	0.12406	1.95166	0.997082	0.740749
	Interval52	-0.5995	0.624491	-0.959983	0.337064	0.549086	0.161459	1.86732	0.74939	0.77854
	Interval54	-0.339594	0.360006	-0.943301	0.345527	0.712059	0.35162	1.44198	0.244928	0.779384
	Interval9	-0.547221	0.624515	-0.876234	0.380903	0.578555	0.170117	1.96763	0.68947	0.801026
	Interval22	-0.478437	0.526573	-0.908586	0.363569	0.619751	0.220795	1.73959	0.506182	0.801026
	Interval76	0.368899	0.450544	0.818787	0.412908	1.44614	0.597999	3.49721	0.339077	0.801026
	Interval24	0.373517	0.450542	0.82904	0.407082	1.45284	0.600769	3.51339	0.342504	0.801026
	Interval88	0.462865	0.55671	0.831429	0.405731	1.58862	0.533505	4.73043	0.524169	0.801026
	Interval67	0.918982	1.10881	0.828802	0.407216	2.50674	0.285281	22.0264	2.07398	0.801026
	Interval64	0.968025	1.10882	0.873022	0.382651	2.63274	0.299613	23.1342	2.16656	0.801026
	Interval96	-0.671023	0.860095	-0.780173	0.435289	0.511185	0.0947219	2.75871	1.19004	0.808513
	Interval7	-0.489712	0.642903	-0.761719	0.446227	0.612803	0.173808	2.16058	0.653143	0.808513
	Interval25	-0.435532	0.568848	-0.765639	0.443891	0.64692	0.212147	1.97271	0.513277	0.808513
	Interval53	0.389843	0.516143	0.755302	0.450068	1.47675	0.536979	4.06122	0.418381	0.808513
	Interval68	-0.463037	0.642888	-0.720246	0.471373	0.629369	0.178512	2.21892	0.627708	0.831378
	Interval47	-0.422606	0.906299	-0.466299	0.641002	0.655337	0.110919	3.87188	0.999973	0.850199
	Interval65	-0.416316	0.906296	-0.459359	0.645976	0.659472	0.11162	3.89629	0.994692	0.850199
	Interval42	-0.366797	0.539334	-0.680093	0.496446	0.69295	0.240775	1.99431	0.425422	0.850199
	Interval59	-0.299788	0.667797	-0.448921	0.653488	0.740975	0.200154	2.74311	0.535826	0.850199
	Interval13	-0.206967	0.486282	-0.425611	0.670391	0.813046	0.313461	2.10886	0.279306	0.850199
	Interval28	-0.206169	0.486282	-0.423969	0.671588	0.813696	0.313712	2.11054	0.278975	0.850199
	Interval72	-0.17588	0.419382	-0.419378	0.67494	0.838719	0.368665	1.9081	0.206815	0.850199
	Interval10	-0.124678	0.198475	-0.628181	0.529885	0.882781	0.598285	1.30256	0.0549369	0.850199
	Interval37	-0.115447	0.185873	-0.621106	0.53453	0.890968	0.618933	1.28257	0.0478769	0.850199
	Interval60	0.0940261	0.205405	0.45776	0.647125	1.09859	0.734498	1.64316	0.0510321	0.850199
	Interval17	0.111854	0.188467	0.593492	0.552852	1.11835	0.772949	1.61809	0.0480311	0.850199
	Interval73	0.12542	0.257351	0.487348	0.626012	1.13362	0.684553	1.87729	0.0819598	0.850199
	Interval44	0.137768	0.24447	0.563535	0.573071	1.14771	0.710779	1.85323	0.0787456	0.850199
	Interval48	0.167816	0.371729	0.451447	0.651668	1.18272	0.570768	2.45077	0.166344	0.850199
	Interval20	0.205986	0.384824	0.535273	0.592461	1.22874	0.577949	2.61233	0.19052	0.850199
	Interval26	0.233967	0.504006	0.464215	0.642494	1.2636	0.470535	3.39336	0.308763	0.850199
	Interval12	0.246746	0.493027	0.500472	0.616742	1.27985	0.486954	3.36383	0.303959	0.850199
	Interval3	0.276725	0.642886	0.430441	0.666875	1.3188	0.374063	4.6496	0.489879	0.850199
	Interval84	0.339221	0.568796	0.596384	0.550918	1.40385	0.460419	4.28046	0.438599	0.850199
	Interval34	0.349005	0.726334	0.480501	0.630871	1.41766	0.341431	5.88625	0.649366	0.850199
	Interval61	0.511004	0.860104	0.594119	0.552433	1.66696	0.308881	8.99626	1.0009	0.850199
	Interval56	0.667201	1.14502	0.582699	0.560096	1.94877	0.206587	18.3832	1.75622	0.850199
	Interval39	-0.236697	0.603638	-0.392117	0.694972	0.789231	0.241756	2.5765	0.420404	0.864295
	Interval35	0.211772	0.583965	0.362645	0.71687	1.23587	0.393451	3.88198	0.385863	0.880244
	Interval29	0.175503	0.53933	0.325409	0.744872	1.19185	0.414126	3.4301	0.321678	0.903191
	Interval36	0.132588	0.474972	0.279148	0.780131	1.14178	0.450067	2.89659	0.243178	0.934194
	Interval83	-0.0977912	0.702978	-0.13911	0.889363	0.906838	0.228635	3.5968	0.503741	0.945802
	Interval40	-0.0950668	0.63006	-0.150885	0.880066	0.909312	0.264481	3.1263	0.406014	0.945802
	Interval75	-0.0949793	0.81126	-0.117076	0.9068	0.909392	0.185435	4.45974	0.667165	0.945802
	Interval50	-0.0913459	0.57592	-0.158609	0.873977	0.912702	0.295186	2.82203	0.340028	0.945802
	Interval11	-0.0893789	0.472089	-0.189326	0.849837	0.914499	0.362521	2.30692	0.230857	0.945802
	Interval86	-0.041374	0.333459	-0.124075	0.901256	0.95947	0.499097	1.8445	0.112907	0.945802
	Interval31	0.0503237	0.381921	0.131765	0.89517	1.05161	0.497459	2.22307	0.148396	0.945802
	Interval38	0.0626689	0.347697	0.18024	0.856964	1.06467	0.538582	2.10466	0.12482	0.945802
	Interval43	0.068305	0.353484	0.193233	0.846776	1.07069	0.535516	2.1407	0.129617	0.945802
	Interval27	0.072007	0.603599	0.119296	0.905041	1.07466	0.329214	3.50805	0.369516	0.945802
	Interval55	0.102814	0.667794	0.15396	0.877641	1.10828	0.299374	4.10288	0.456519	0.945802
	Interval30	0.106967	0.66779	0.16018	0.872739	1.1129	0.300622	4.11993	0.457385	0.945802
	Interval91	-0.0916315	1.40142	-0.0653847	0.947868	0.912441	0.0585183	14.2272	1.97238	0.958784
	Interval85	-0.0247866	0.37481	-0.0661312	0.947273	0.975518	0.467941	2.03367	0.141097	0.958784
	Interval74	0.0331721	0.517261	0.0641302	0.948867	1.03373	0.375063	2.8491	0.26866	0.958784
	Interval2	0.0170174	0.486282	0.034995	0.972084	1.01716	0.392156	2.63829	0.236759	0.9721

## Sheet: Pp vs Mir on CH2
	Term	Estimate	Std. Error	z value	Pr(>|z|)	Odds Ratio (Pp over Mir)	95% Odds Ratio CI		Variance + Bias^2	Benjamini & Hochberg Corrected p-values
	Species : Pp	-0.270614	0.0601714	-4.49738	6.87952e-06	0.762911	0.67804	0.858406
Difference Between Intervals Over Both Species (Main Effect)	Interval1	1.2569	0.175143	7.17641	7.15644e-13		2.49332	4.9539
	Interval2	0.131513	0.302866	0.434227	0.664123		0.629956	2.065
	Interval3	0.0891598	0.302806	0.294445	0.768418		0.603904	1.97913
	Interval4	-0.341162	0.377578	-0.903554	0.366232		0.339184	1.49017
	Interval5	-0.650781	0.445565	-1.46058	0.144132		0.21782	1.24923
	Interval6	0.181932	0.29031	0.626681	0.530868		0.679039	2.11899
	Interval7	-0.642157	0.445573	-1.44119	0.14953		0.219703	1.26007
	Interval8	1.37168	0.16481	8.32278	8.59229e-17		2.85379	5.44504
	Interval9	-1.09751	0.573681	-1.91311	0.0557344		0.1084	1.02727
	Interval10	2.0668	0.12425	16.6342	3.939e-62		6.19208	10.0778
	Interval11	0.108349	0.302833	0.357785	0.720504		0.615572	2.01759
	Interval12	1.01947	0.194049	5.2537	1.49072e-07		1.89485	4.05443
	Interval13	0.0882963	0.302805	0.291595	0.770597		0.603384	1.97742
	Interval14	-2.55573	0.990731	-2.57964	0.00989042		0.0111362	0.54124
	Interval15	-1.86536	0.990974	-1.88235	0.0597886		0.0221999	1.07999
	Interval16	0.0865714	0.302802	0.285901	0.774954		0.602347	1.974
	Interval17	1.87476	0.133285	14.0658	6.1604e-45		5.02046	8.46549
	Interval18	1.29828	0.170736	7.60402	2.8707e-14		2.62121	5.11879
	Interval19	2.12839	0.121085	17.5776	3.65596e-69		6.62642	10.6517
	Interval20	0.620894	0.232824	2.6668	0.00765775		1.17887	2.93653
	Interval21	-0.650781	0.445565	-1.46058	0.144132		0.21782	1.24923
	Interval22	-1.09666	0.573682	-1.91161	0.0559261		0.108493	1.02815
	Interval23	-0.652497	0.445563	-1.46443	0.143076		0.217447	1.24708
	Interval24	0.462692	0.252743	1.83068	0.0671483		0.967844	2.60666
	Interval25	-0.206183	0.353673	-0.582975	0.55991		0.406821	1.62745
	Interval26	-0.214837	0.353663	-0.607463	0.543544		0.403324	1.6134
	Interval27	-0.214837	0.353663	-0.607463	0.543544		0.403324	1.6134
	Interval28	-0.652497	0.445563	-1.46443	0.143076		0.217447	1.24708
	Interval29	-0.848925	0.497491	-1.70641	0.0879311		0.161378	1.13446
	Interval30	-1.86194	0.990975	-1.87889	0.0602592		0.022276	1.08369
	Interval31	-0.485126	0.407286	-1.19112	0.233607		0.277092	1.36773
	Interval32	-0.850641	0.497489	-1.70987	0.0872903		0.161102	1.13251
	Interval33	0.172383	0.290296	0.593819	0.552633		0.672605	2.0988
	Interval34	-0.216559	0.353661	-0.612335	0.540316		0.402631	1.61061
	Interval35	-0.217419	0.35366	-0.614768	0.538708		0.402286	1.60923
	Interval36	0.249221	0.279274	0.892389	0.372184		0.742186	2.21798
	Interval37	2.35058	0.111483	21.0846	1.10102e-98		8.43231	13.0539
	Interval38	0.894235	0.204549	4.37174	1.23258e-05		1.63774	3.65154
	Interval39	-0.10572	0.333876	-0.316645	0.751513		0.467611	1.73096
	Interval40	-0.341162	0.377578	-0.903554	0.366232		0.339184	1.49017
	Interval41	-0.103136	0.333879	-0.308903	0.757396		0.468818	1.73545
	Interval42	-0.0988147	0.333885	-0.295954	0.767265		0.470844	1.74299
	Interval43	0.676091	0.227231	2.97535	0.00292659		1.2595	3.06934
	Interval44	1.32016	0.168672	7.82677	5.0055e-15		2.69005	5.2109
	Interval45	1.49518	0.156359	9.5625	1.14943e-21		3.28286	6.05959
	Interval46	-0.523137	0.289564	-1.80663	0.0708195		0.335987	1.04541
	Interval47	-1.8585	0.990977	-1.87542	0.0607345		0.0223526	1.08743
	Interval48	0.864768	0.208522	4.14713	3.36676e-05		1.57785	3.57323
	Interval49	0.636635	0.232853	2.73407	0.00625568		1.19751	2.98329
	Interval50	-0.0581551	0.333938	-0.17415	0.861748		0.490332	1.8155
	Interval51	1.49429	0.156356	9.55695	1.21273e-21		3.27996	6.05416
	Interval52	0.321446	0.269469	1.19289	0.232913		0.813253	2.33872
	Interval53	-0.217419	0.35366	-0.614768	0.538708		0.402286	1.60923
	Interval54	-0.00333127	0.317165	-0.0105033	0.99162		0.535275	1.85579
	Interval55	-0.342021	0.377577	-0.905833	0.365024		0.338893	1.48889
	Interval56	-0.652497	0.445563	-1.46443	0.143076		0.217447	1.24708
	Interval57	0.45311	0.252727	1.79288	0.0729916		0.958645	2.58172
	Interval58	-1.09751	0.573681	-1.91311	0.0557344		0.1084	1.02727
	Interval59	-1.8645	0.990974	-1.88149	0.0599058		0.0222189	1.08091
	Interval60	1.82336	0.135978	13.4093	5.33489e-41		4.74384	8.08393
	Interval61	-1.09837	0.57368	-1.9146	0.0555434		0.108307	1.02639
	Interval62	0.451378	0.252724	1.78605	0.0740913		0.956991	2.57724
	Interval63	-0.485126	0.407286	-1.19112	0.233607		0.277092	1.36773
	Interval64	-1.09751	0.573681	-1.91311	0.0557344		0.1084	1.02727
	Interval65	0.0865714	0.302802	0.285901	0.774954		0.602347	1.974
	Interval66	0.626986	0.232835	2.69284	0.0070847		1.18605	2.95454
	Interval67	-0.844622	0.497494	-1.69775	0.0895546		0.162073	1.13936
	Interval68	-1.09751	0.573681	-1.91311	0.0557344		0.1084	1.02727
	Interval69	0.974961	0.197339	4.94053	7.79094e-07		1.8007	3.903
	Interval70	-0.180653	0.353704	-0.510746	0.609529		0.417315	1.66964
	Interval71	0.282601	0.279325	1.01173	0.311668		0.767301	2.2935
	Interval72	-0.342881	0.377576	-0.908111	0.36382		0.338602	1.48761
	Interval73	0.0874335	0.302804	0.288746	0.772775		0.602865	1.97571
	Interval74	-0.485126	0.407286	-1.19112	0.233607		0.277092	1.36773
	Interval75	-0.212248	0.353666	-0.600139	0.548414		0.404367	1.61759
	Interval76	-0.337715	0.377581	-0.894416	0.371099		0.340352	1.49533
	Interval77	1.23463	0.175087	7.05153	1.76955e-12		2.43869	4.84431
	Interval78	-0.485126	0.407286	-1.19112	0.233607		0.277092	1.36773
	Interval79	0.81172	0.212711	3.81607	0.000135594		1.4841	3.41656
	Interval80	0.0874335	0.302804	0.288746	0.772775		0.602865	1.97571
	Interval81	1.31927	0.16867	7.82164	5.21408e-15		2.68768	5.20628
	Interval82	1.52138	0.154851	9.82484	8.80133e-23		3.38	6.20213
	Interval83	-2.55315	0.990732	-2.57704	0.00996514		0.0111648	0.542635
	Interval84	-1.41621	0.701672	-2.01834	0.0435557		0.0613298	0.95989
	Interval85	-0.212248	0.353666	-0.600139	0.548414		0.404367	1.61759
	Interval86	0.620894	0.232824	2.6668	0.00765775		1.17887	2.93653
	Interval87	1.23375	0.175085	7.04659	1.8335e-12		2.43656	4.84002
	Interval88	0.972334	0.197334	4.92736	8.33467e-07		1.796	3.89272
	Interval89	0.388923	0.260673	1.492	0.1357		0.885152	2.45921
	Interval90	-0.65164	0.445564	-1.46251	0.143603		0.217633	1.24815
	Interval91	-1.08632	0.573689	-1.89356	0.0582833		0.109619	1.03885
	Interval92	-0.372781	0.26868	-1.38745	0.165304		0.406816	1.1663
	Interval93	-1.34629	0.445091	-3.02474	0.00248843		0.108754	0.622564
	Interval94	-0.234168	0.25189	-0.929642	0.352557		0.482935	1.29633
	Interval95	1.36991	0.164805	8.31228	9.38792e-17		2.84878	5.43536
	Interval96	0.17152	0.290295	0.590846	0.554623		0.672026	2.09698
Difference In Each Interval Between the Species (Interaction effect)	Interval95	-1.6317	0.411799	-3.96236	7.42123e-05	0.195597	0.0872633	0.438423	2.83202	0.0097
	Interval73	1.25239	0.348449	3.59419	0.000325406	3.4987	1.76726	6.92647	1.6899	0.01455
	Interval1	-1.18202	0.362106	-3.26429	0.00109739	0.306659	0.150808	0.623572	1.52829	0.0355667
	Interval79	0.776031	0.262798	2.95296	0.00314741	2.17283	1.29816	3.63684	0.671287	0.075175
	Interval88	-0.989404	0.387651	-2.5523	0.0107013	0.371798	0.173913	0.794846	1.12919	0.153814
	Interval12	-0.943172	0.37162	-2.538	0.0111488	0.389391	0.187956	0.806705	1.02767	0.153814
	Interval63	1.23452	0.469016	2.63214	0.00848484	3.43672	1.3706	8.61744	1.74401	0.153814
	Interval94	-1.47584	0.626152	-2.35701	0.0184229	0.228586	0.0669973	0.779903	2.57018	0.214478
	Interval49	0.677595	0.291077	2.32789	0.019918	1.96914	1.11303	3.48374	0.54386	0.214478
	Interval87	-0.694732	0.307217	-2.26137	0.0237365	0.499208	0.273384	0.911571	0.577035	0.22989
	Interval37	-0.374712	0.172671	-2.17009	0.0300001	0.687487	0.490099	0.964374	0.170224	0.264545
	Interval96	-1.51105	0.759253	-1.99018	0.0465716	0.220679	0.0498277	0.97735	2.85973	0.314394
	Interval92	-1.09157	0.56497	-1.93208	0.0533494	0.335689	0.110924	1.0159	1.51072	0.314394
	Interval52	-1.08501	0.565657	-1.91814	0.0550935	0.337899	0.111504	1.02396	1.49721	0.314394
	Interval77	-0.588482	0.295934	-1.98856	0.0467498	0.555169	0.310829	0.991584	0.433889	0.314394
	Interval31	0.95666	0.483412	1.97898	0.0478187	2.60299	1.00922	6.71368	1.14889	0.314394
	Interval15	2.03671	1.03613	1.96568	0.0493355	7.66534	1.0059	58.4127	5.22176	0.314394
	Interval65	-1.42539	0.764123	-1.86539	0.0621262	0.240414	0.0537682	1.07497	2.61562	0.3298
	Interval46	-1.18688	0.642235	-1.84804	0.0645965	0.305173	0.0866693	1.07455	1.82114	0.3298
	Interval8	-0.491243	0.272431	-1.80318	0.0713593	0.611865	0.358722	1.04365	0.315539	0.34629
	Interval81	-0.474635	0.274736	-1.7276	0.0840598	0.622112	0.363085	1.06593	0.300759	0.388462
	Interval41	-1.2371	0.776962	-1.59223	0.111334	0.290225	0.0632953	1.33075	2.13408	0.41207
	Interval66	-0.648349	0.406869	-1.59351	0.111046	0.522908	0.235555	1.1608	0.585899	0.41207
	Interval18	-0.438455	0.276029	-1.58844	0.112188	0.645032	0.375509	1.10801	0.268435	0.41207
	Interval16	0.628779	0.381784	1.64695	0.0995678	1.87532	0.887349	3.96329	0.541122	0.41207
	Interval32	0.930512	0.589868	1.57749	0.114683	2.53581	0.798013	8.05791	1.2138	0.41207
	Interval84	1.28187	0.785668	1.63157	0.10277	3.60338	0.772566	16.8068	2.26047	0.41207
	Interval85	0.681633	0.439184	1.55204	0.120652	1.9771	0.835965	4.67596	0.657507	0.418139
	Interval23	0.818852	0.538581	1.52039	0.128413	2.26789	0.789176	6.51736	0.960588	0.429476
	Interval33	0.547342	0.371947	1.47156	0.14114	1.72865	0.833873	3.58357	0.437928	0.456223
	Interval80	0.558717	0.385502	1.44933	0.147247	1.74843	0.821301	3.72215	0.460776	0.460594
	Interval76	0.665555	0.469482	1.41764	0.156297	1.94557	0.775204	4.88291	0.663378	0.473784
	Interval4	-1.43441	1.0604	-1.3527	0.176151	0.238256	0.0298134	1.90405	3.18198	0.514639
	Interval10	-0.249358	0.188356	-1.32386	0.185549	0.779301	0.538732	1.12729	0.0976574	0.514639
	Interval51	0.279178	0.211627	1.31919	0.187104	1.32204	0.873181	2.00164	0.122726	0.514639
	Interval70	0.581281	0.444491	1.30775	0.190959	1.78833	0.748323	4.27372	0.53546	0.514639
	Interval75	-0.804439	0.673828	-1.19383	0.232543	0.447339	0.119416	1.67575	1.10117	0.595337
	Interval29	0.711738	0.610267	1.16627	0.243505	2.03753	0.616075	6.73866	0.878996	0.595337
	Interval97	0.818707	0.533275	1.53524	0.245545	2.26757	0.797309	6.449	0.954663	0.595337
	Interval30	1.29082	1.08647	1.18809	0.234797	3.63578	0.432292	30.5787	2.84664	0.595337
	Interval90	-1.13174	1.08647	-1.04167	0.297564	0.322471	0.0383416	2.71213	2.46125	0.650288
	Interval93	-1.13113	1.08601	-1.04155	0.297622	0.32267	0.0383999	2.71135	2.45886	0.650288
	Interval3	-0.488924	0.507377	-0.963631	0.335231	0.613286	0.226869	1.65787	0.496478	0.650288
	Interval17	0.194284	0.184174	1.05489	0.291473	1.21444	0.846456	1.7424	0.0716666	0.650288
	Interval54	0.406104	0.416006	0.976199	0.328966	1.50096	0.664137	3.39219	0.337981	0.650288
	Interval72	0.511373	0.483846	1.05689	0.290561	1.66758	0.645994	4.30472	0.49561	0.650288
	Interval22	0.6912	0.703453	0.982582	0.325813	1.99611	0.502797	7.92457	0.972604	0.650288
	Interval58	0.709953	0.703462	1.00923	0.312865	2.0339	0.512307	8.07472	0.998892	0.650288
	Interval83	1.08951	1.1084	0.982956	0.325629	2.97281	0.338593	26.101	2.41558	0.650288
	Interval59	1.09596	1.10877	0.988442	0.322936	2.99205	0.340534	26.2892	2.43051	0.650288
	Interval19	0.154802	0.168794	0.917108	0.359086	1.16743	0.83859	1.62521	0.0524551	0.667836
	Interval45	0.198349	0.214895	0.923002	0.356006	1.21939	0.800238	1.85808	0.085522	0.667836
	Interval28	0.51531	0.568732	0.906069	0.364899	1.67416	0.549139	5.104	0.589	0.667836
	Interval78	0.459488	0.526506	0.872712	0.38282	1.58326	0.564134	4.44349	0.488339	0.687622
	Interval48	-0.274141	0.321875	-0.851701	0.39438	0.760225	0.404535	1.42866	0.178757	0.695578
	Interval39	-0.421149	0.556674	-0.756544	0.449323	0.656293	0.220418	1.95411	0.487253	0.778252
	Interval14	0.844297	1.14462	0.73762	0.460746	2.32634	0.246803	21.9279	2.023	0.783998
	Interval91	-0.697067	1.14499	-0.608797	0.542659	0.498044	0.0527998	4.6979	1.79691	0.797605
	Interval34	-0.354552	0.568733	-0.623407	0.533017	0.701488	0.230094	2.13863	0.449165	0.797605
	Interval50	-0.345881	0.526546	-0.656886	0.511254	0.707597	0.252104	1.98605	0.396885	0.797605
	Interval38	-0.202705	0.314315	-0.644908	0.518987	0.816519	0.440977	1.51188	0.139883	0.797605
	Interval44	0.150935	0.234225	0.644401	0.519316	1.16292	0.734808	1.84046	0.0776424	0.797605
	Interval62	0.215742	0.347571	0.620714	0.534788	1.24078	0.627823	2.45219	0.167351	0.797605
	Interval53	0.300154	0.474896	0.632042	0.52736	1.35007	0.53225	3.42448	0.315618	0.797605
	Interval74	0.34865	0.539269	0.646523	0.517941	1.41715	0.492472	4.07805	0.412368	0.797605
	Interval5	0.391125	0.583907	0.669841	0.502959	1.47864	0.470795	4.64403	0.493926	0.797605
	Interval42	-0.306641	0.526512	-0.582402	0.560296	0.735914	0.262211	2.0654	0.371244	0.80724
	Interval26	0.279155	0.486282	0.574061	0.565926	1.32201	0.509688	3.429	0.314398	0.80724
	Interval56	-0.364899	0.726286	-0.502418	0.615374	0.694267	0.167224	2.88239	0.660642	0.807619
	Interval25	-0.274396	0.568799	-0.482413	0.629513	0.760031	0.249264	2.31741	0.398825	0.807619
	Interval13	-0.225484	0.465424	-0.484469	0.628053	0.79813	0.320551	1.98724	0.267463	0.807619
	Interval6	-0.206147	0.442276	-0.466105	0.64114	0.813713	0.341978	1.93617	0.238105	0.807619
	Interval57	-0.184121	0.384718	-0.478588	0.632232	0.831835	0.391344	1.76814	0.181908	0.807619
	Interval82	0.109935	0.216586	0.507582	0.611747	1.11621	0.730101	1.7065	0.058995	0.807619
	Interval61	0.361562	0.759265	0.4762	0.633932	1.43557	0.324134	6.35804	0.70721	0.807619
	Interval64	0.37696	0.759273	0.496475	0.619559	1.45785	0.329159	6.45681	0.718594	0.807619
	Interval9	0.381439	0.759275	0.502373	0.615405	1.46439	0.330635	6.48582	0.721995	0.807619
	Interval40	-0.230659	0.583906	-0.395027	0.692823	0.794011	0.252811	2.49377	0.394149	0.810898
	Interval55	-0.22767	0.583906	-0.389908	0.696605	0.796387	0.253567	2.50124	0.39278	0.810898
	Interval27	-0.189909	0.539271	-0.35216	0.724719	0.827034	0.2874	2.37991	0.326879	0.810898
	Interval36	-0.159289	0.422433	-0.377074	0.706118	0.85275	0.372597	1.95166	0.203823	0.810898
	Interval2	-0.157151	0.450616	-0.348747	0.72728	0.854575	0.353328	2.06691	0.227752	0.810898
	Interval24	-0.133425	0.376465	-0.354414	0.723028	0.875093	0.418409	1.83024	0.159528	0.810898
	Interval69	0.112448	0.276475	0.406718	0.684215	1.11901	0.650871	1.92387	0.0890831	0.810898
	Interval21	0.246745	0.603543	0.408828	0.682666	1.27985	0.392115	4.1774	0.425148	0.810898
	Interval68	0.328968	0.75925	0.433281	0.664811	1.38953	0.313749	6.15398	0.684681	0.810898
	Interval47	0.518972	1.21418	0.427427	0.669068	1.6803	0.155545	18.1517	1.74356	0.810898
	Interval71	0.118741	0.387929	0.306091	0.759535	1.12608	0.52645	2.40869	0.164588	0.837176
	Interval11	-0.131139	0.450596	-0.291035	0.771024	0.877096	0.362653	2.1213	0.220234	0.840303
	Interval86	0.0792943	0.329037	0.240989	0.809564	1.08252	0.568008	2.0631	0.114553	0.872569
	Interval7	-0.127098	0.667747	-0.190338	0.849044	0.880648	0.237906	3.25987	0.46204	0.895141
	Interval60	0.0379791	0.194766	0.194999	0.845394	1.03871	0.709098	1.52154	0.0393761	0.895141
	Interval20	-0.0592768	0.34344	-0.172597	0.862968	0.942446	0.480745	1.84756	0.121464	0.900118
	Interval67	0.0782094	0.703458	0.111178	0.911475	1.08135	0.272377	4.29301	0.50097	0.94059
	Interval35	-0.0443716	0.517197	-0.0857924	0.931631	0.956598	0.347122	2.63619	0.269462	0.941304
	Interval43	-0.0292244	0.329478	-0.0886991	0.929321	0.971198	0.509156	1.85253	0.10941	0.941304
	Interval89	0.0195909	0.374729	0.0522802	0.958305	1.01978	0.489252	2.12561	0.140805	0.9583

## Sheet: Mir vs Flg on CHX
	Term	Estimate	Std. Error	z value	Pr(>|z|)	Odds Ratio (Mir over Flg)	95% Odds Ratio CI		Variance + Bias^2	Benjamini & Hochberg Corrected p-values
	Species : Mir	0.534454	0.0936993	5.70393	1.17078e-08	1.70652	1.42021	2.05054
Difference Between Intervals Over Both Species (Main Effect)	Interval1	0.963134	0.223855	4.30249	1.68889e-05		1.68941	4.06287
	Interval2	0.164501	0.319606	0.5147	0.606763		0.630068	2.20544
	Interval3	1.10292	0.208368	5.29313	1.20241e-07		2.00274	4.53272
	Interval4	-1.25131	0.695672	-1.79871	0.0720651		0.0731806	1.11874
	Interval5	-1.24013	0.695678	-1.78262	0.0746478		0.0740023	1.13133
	Interval6	0.0743309	0.3358	0.221355	0.824816		0.557754	2.08027
	Interval7	-0.170745	0.378229	-0.451433	0.651677		0.40169	1.7693
	Interval8	-1.23611	0.69568	-1.77683	0.0755955		0.0743002	1.1359
	Interval9	-0.0348928	0.354993	-0.0982914	0.921701		0.481581	1.93652
	Interval10	-0.927588	0.569975	-1.62742	0.103648		0.129414	1.20872
	Interval11	-0.928383	0.569975	-1.62881	0.103352		0.129311	1.20776
	Interval12	-0.924402	0.569977	-1.62182	0.104841		0.129826	1.21258
	Interval13	0.0670962	0.335792	0.199815	0.841625		0.553743	2.06524
	Interval14	1.10454	0.208371	5.30083	1.15275e-07		2.00598	4.5401
	Interval15	-1.69127	0.98008	-1.72565	0.0844104		0.0269915	1.2582
	Interval16	-1.69207	0.980078	-1.72647	0.0842637		0.0269702	1.25719
	Interval17	-0.922006	0.569979	-1.61761	0.105746		0.130137	1.2155
	Interval18	-1.24653	0.695674	-1.79184	0.0731594		0.0735305	1.12411
	Interval19	-1.68808	0.980087	-1.72238	0.0850005		0.0270774	1.26224
	Interval20	-1.68087	0.980103	-1.71499	0.0863473		0.0272727	1.27142
	Interval21	-0.463348	0.444538	-1.04231	0.297267		0.263252	1.50373
	Interval22	-1.66546	0.980137	-1.69921	0.0892798		0.0276944	1.29125
	Interval23	2.23259	0.137755	16.2069	4.50392e-59		7.11776	12.2141
	Interval24	-0.172342	0.378227	-0.455657	0.648637		0.401051	1.76647
	Interval25	0.789084	0.238616	3.30692	0.000943292		1.37905	3.51406
	Interval26	2.02564	0.147968	13.6897	1.16941e-42		5.67244	10.1315
	Interval27	0.416926	0.283057	1.47294	0.140767		0.871216	2.64248
	Interval28	-0.926792	0.569976	-1.62602	0.103945		0.129517	1.20969
	Interval29	0.426577	0.28307	1.50696	0.13182		0.879641	2.66817
	Interval30	0.490691	0.273639	1.7932	0.0729403		0.955384	2.79274
	Interval31	0.681759	0.250697	2.71946	0.00653893		1.20973	3.23207
	Interval32	0.556501	0.265202	2.0984	0.0358698		1.03739	2.9338
	Interval33	1.5392	0.174863	8.80228	1.34058e-18		3.3084	6.56616
	Interval34	2.17187	0.140779	15.4275	1.06946e-53		6.65885	11.5629
	Interval35	-0.673588	0.49531	-1.35993	0.173852		0.193129	1.34611
	Interval36	2.6774	0.122195	21.9109	2.04393e-106		11.4489	18.4839
	Interval37	0.166101	0.319608	0.519701	0.603272		0.631075	2.20898
	Interval38	-0.911555	0.569986	-1.59926	0.109763		0.131503	1.22828
	Interval39	0.805298	0.238642	3.3745	0.000739511		1.40152	3.57168
	Interval40	0.489088	0.273637	1.78736	0.0738794		0.953858	2.78826
	Interval41	1.02448	0.215585	4.7521	2.01316e-06		1.82565	4.25046
	Interval42	1.27895	0.193645	6.60464	3.98491e-11		2.45815	5.25142
	Interval43	-0.483429	0.444521	-1.08753	0.276804		0.258027	1.47378
Difference In Each Interval Between the Species (Interaction effect)	Interval34	-0.802332	0.203794	-3.93698	8.25149e-05	0.448282	0.300662	0.668382	0.685269	0.0044
	Interval26	-0.687666	0.213407	-3.22233	0.00127155	0.502748	0.330899	0.763846	0.518426	0.0286
	Interval31	-1.18772	0.43109	-2.75517	0.00586618	0.304914	0.130987	0.709788	1.59653	0.0865333
	Interval14	-0.821231	0.3214	-2.55517	0.0106137	0.43989	0.234295	0.825896	0.777718	0.103714
	Interval42	-0.715848	0.284521	-2.51598	0.0118703	0.488777	0.279848	0.85369	0.593391	0.103714
	Interval23	-0.455222	0.186918	-2.43541	0.0148747	0.634307	0.439736	0.91497	0.242166	0.103714
	Interval13	0.911392	0.380231	2.39695	0.0165323	2.48778	1.18074	5.24169	0.975212	0.103714
	Interval5	1.67007	0.730138	2.28734	0.0221762	5.31254	1.26998	22.2233	3.32224	0.1221
	Interval40	-0.995054	0.444822	-2.23697	0.0252882	0.369704	0.154601	0.884084	1.188	0.123689
	Interval41	-0.628135	0.312882	-2.00758	0.0446878	0.533586	0.288984	0.985223	0.492449	0.19668
	Interval16	1.97881	1.0086	1.96194	0.0497696	7.2341	1.00196	52.23	4.93294	0.1992
	Interval27	-0.856142	0.450741	-1.89941	0.0575107	0.424798	0.175592	1.02769	0.936146	0.210833
	Interval28	1.14842	0.620241	1.85157	0.0640873	3.15321	0.93496	10.6344	1.70357	0.216954
	Interval32	0.525794	0.312876	1.68052	0.0928563	1.6918	0.916271	3.12374	0.37435	0.291971
	Interval21	-1.24485	0.823744	-1.51121	0.130735	0.287984	0.0573038	1.44728	2.22821	0.383387
	Interval6	0.488775	0.395241	1.23665	0.216217	1.63032	0.75134	3.5376	0.395117	0.59455
	Interval17	0.721762	0.644459	1.11995	0.262735	2.05806	0.581946	7.27833	0.936268	0.618316
	Interval37	-0.513621	0.460349	-1.11572	0.264542	0.598325	0.242706	1.47501	0.475728	0.618316
	Interval4	0.855321	0.770513	1.11007	0.26697	2.35213	0.519502	10.6496	1.32526	0.618316
	Interval30	-0.3869	0.383141	-1.00981	0.312586	0.679159	0.320505	1.43916	0.296489	0.655026
	Interval8	0.769656	0.779098	0.987881	0.323211	2.15902	0.468895	9.9412	1.19936	0.655026
	Interval25	-0.311966	0.322501	-0.967335	0.333377	0.732006	0.389042	1.37731	0.20133	0.655026
	Interval35	-0.715049	0.753114	-0.949457	0.342388	0.489168	0.111788	2.14053	1.07848	0.655026
	Interval36	-0.141961	0.1588	-0.893964	0.371341	0.867655	0.635586	1.18446	0.0453703	0.680717
	Interval1	-0.243611	0.296459	-0.821738	0.411226	0.783792	0.43838	1.40137	0.147234	0.6996
	Interval7	0.371578	0.45434	0.817841	0.413448	1.45002	0.595157	3.53278	0.344496	0.6996
	Interval9	0.31639	0.427471	0.740145	0.459212	1.37217	0.593658	3.17159	0.282834	0.748326
	Interval15	0.749367	1.07477	0.697234	0.485656	2.11566	0.257384	17.3904	1.71669	0.757103
	Interval3	-0.185359	0.274197	-0.676009	0.499035	0.830806	0.485399	1.422	0.109542	0.757103
	Interval38	-0.477082	0.804197	-0.593241	0.55302	0.620592	0.12831	3.00159	0.874339	0.811067
	Interval39	-0.16026	0.312006	-0.513644	0.607501	0.851922	0.462184	1.57031	0.123031	0.825259
	Interval19	0.547175	1.09676	0.498903	0.617848	1.72836	0.201399	14.8325	1.50228	0.825259
	Interval20	0.542533	1.09677	0.494663	0.620838	1.72036	0.20046	14.7642	1.49725	0.825259
	Interval18	-0.462523	0.982294	-0.470859	0.637741	0.629693	0.0918297	4.31792	1.17883	0.825259
	Interval43	0.188106	0.544724	0.345324	0.729851	1.20696	0.414968	3.51053	0.332109	0.891805
	Interval44	0.199026	0.548517	0.362843	0.747053	1.22021	0.416417	3.57555	0.340482	0.891805
	Interval2	0.116126	0.39857	0.291356	0.770779	1.12314	0.514237	2.45303	0.172343	0.891805
	Interval11	-0.213383	0.75311	-0.283336	0.776919	0.807847	0.184616	3.535	0.612707	0.891805
	Interval24	-0.121257	0.492121	-0.246397	0.805375	0.885806	0.337627	2.32402	0.256886	0.891805
	Interval10	0.151335	0.698306	0.216717	0.828429	1.16339	0.296015	4.57229	0.510533	0.891805
	Interval12	0.149007	0.698308	0.213383	0.831028	1.16068	0.295326	4.56168	0.509837	0.891805
	Interval29	-0.0525042	0.366173	-0.143386	0.885985	0.94885	0.462919	1.94487	0.136839	0.92819
	Interval33	0.0252097	0.222378	0.113364	0.909742	1.02553	0.663218	1.58577	0.0500874	0.930856
	Interval22	-0.0461679	1.20067	-0.0384519	0.969327	0.954882	0.0907653	10.0457	1.44374	0.9693

## Sheet: Pp vs Flg on CHX
	Term	Estimate	Std. Error	z value	Pr(>|z|)	Odds Ratio (Pp over Mir)	95% Odds Ratio CI		Variance + Bias^2	Benjamini & Hochberg Corrected p-values
	Species : Pp	0.0584531	0.100863	0.579531	0.562231	1.0602	0.870021	1.29194
Difference Between Intervals Over Both Species (Main Effect)	Interval1	0.963134	0.223855	4.30249	1.68889e-05		1.68941	4.06287
	Interval2	0.164501	0.319606	0.5147	0.606763		0.630068	2.20544
	Interval3	1.10292	0.208368	5.29313	1.20241e-07		2.00274	4.53272
	Interval4	-1.25131	0.695672	-1.79871	0.0720651		0.0731806	1.11874
	Interval5	-1.24013	0.695678	-1.78262	0.0746478		0.0740023	1.13133
	Interval6	0.0743309	0.3358	0.221355	0.824816		0.557754	2.08027
	Interval7	-0.170745	0.378229	-0.451433	0.651677		0.40169	1.7693
	Interval8	-1.23611	0.69568	-1.77683	0.0755955		0.0743002	1.1359
	Interval9	-0.0348928	0.354993	-0.0982914	0.921701		0.481581	1.93652
	Interval10	-0.927588	0.569975	-1.62742	0.103648		0.129414	1.20872
	Interval11	-0.928383	0.569975	-1.62881	0.103352		0.129311	1.20776
	Interval12	-0.924402	0.569977	-1.62182	0.104841		0.129826	1.21258
	Interval13	0.0670962	0.335792	0.199815	0.841625		0.553743	2.06524
	Interval14	1.10454	0.208371	5.30083	1.15275e-07		2.00598	4.5401
	Interval15	-1.69127	0.98008	-1.72565	0.0844104		0.0269915	1.2582
	Interval16	-1.69207	0.980078	-1.72647	0.0842637		0.0269702	1.25719
	Interval17	-0.922006	0.569979	-1.61761	0.105746		0.130137	1.2155
	Interval18	-1.24653	0.695674	-1.79184	0.0731594		0.0735305	1.12411
	Interval19	-1.68808	0.980087	-1.72238	0.0850005		0.0270774	1.26224
	Interval20	-1.68087	0.980103	-1.71499	0.0863473		0.0272727	1.27142
	Interval21	-0.463348	0.444538	-1.04231	0.297267		0.263252	1.50373
	Interval22	-1.66546	0.980137	-1.69921	0.0892798		0.0276944	1.29125
	Interval23	2.23259	0.137755	16.2069	4.50392e-59		7.11776	12.2141
	Interval24	-0.172342	0.378227	-0.455657	0.648637		0.401051	1.76647
	Interval25	0.789084	0.238616	3.30692	0.000943292		1.37905	3.51406
	Interval26	2.02564	0.147968	13.6897	1.16941e-42		5.67244	10.1315
	Interval27	0.416926	0.283057	1.47294	0.140767		0.871216	2.64248
	Interval28	-0.926792	0.569976	-1.62602	0.103945		0.129517	1.20969
	Interval29	0.426577	0.28307	1.50696	0.13182		0.879641	2.66817
	Interval30	0.490691	0.273639	1.7932	0.0729403		0.955384	2.79274
	Interval31	0.681759	0.250697	2.71946	0.00653893		1.20973	3.23207
	Interval32	0.556501	0.265202	2.0984	0.0358698		1.03739	2.9338
	Interval33	1.5392	0.174863	8.80228	1.34058e-18		3.3084	6.56616
	Interval34	2.17187	0.140779	15.4275	1.06946e-53		6.65885	11.5629
	Interval35	-0.673588	0.49531	-1.35993	0.173852		0.193129	1.34611
	Interval36	2.6774	0.122195	21.9109	2.04393e-106		11.4489	18.4839
	Interval37	0.166101	0.319608	0.519701	0.603272		0.631075	2.20898
	Interval38	-0.911555	0.569986	-1.59926	0.109763		0.131503	1.22828
	Interval39	0.805298	0.238642	3.3745	0.000739511		1.40152	3.57168
	Interval40	0.489088	0.273637	1.78736	0.0738794		0.953858	2.78826
	Interval41	1.02448	0.215585	4.7521	2.01316e-06		1.82565	4.25046
	Interval42	1.27895	0.193645	6.60464	3.98491e-11		2.45815	5.25142
	Interval43	-0.483429	0.444521	-1.08753	0.276804		0.258027	1.47378
Difference In Each Interval Between the Species (Interaction effect)	Interval1	-1.18093	0.417556	-2.82819	0.00468117	0.306993	0.135425	0.695921	1.56895	0.1936
	Interval3	-0.93751	0.357611	-2.62159	0.00875209	0.391602	0.194285	0.789313	1.00681	0.1936
	Interval14	-0.861581	0.348954	-2.46904	0.0135476	0.422493	0.213199	0.837251	0.864091	0.198
	Interval26	0.37859	0.189697	1.99576	0.0459603	1.46022	1.00681	2.11784	0.179315	0.3498
	Interval40	-0.975158	0.488765	-1.99515	0.0460268	0.377133	0.144693	0.982968	1.18982	0.3498
	Interval25	0.581807	0.293897	1.97963	0.0477452	1.78927	1.00579	3.18306	0.424874	0.3498
	Interval28	1.17619	0.635002	1.85226	0.0639879	3.242	0.933875	11.2548	1.78665	0.402286
	Interval9	-0.819242	0.607928	-1.3476	0.177788	0.440766	0.133884	1.45106	1.04073	0.778024
	Interval31	-0.501273	0.383833	-1.30597	0.191564	0.605759	0.285479	1.28536	0.398602	0.778024
	Interval2	-0.654838	0.515906	-1.2693	0.204336	0.519526	0.188999	1.42809	0.694972	0.778024
	Interval32	0.421379	0.334682	1.25904	0.208015	1.52406	0.790889	2.9369	0.289573	0.778024
	Interval5	0.89916	0.790732	1.13712	0.255486	2.45754	0.521694	11.5767	1.43375	0.778024
	Interval29	0.379519	0.355754	1.0668	0.286062	1.46158	0.727778	2.93526	0.270595	0.778024
	Interval6	-0.560401	0.526095	-1.06521	0.286781	0.57098	0.20361	1.60119	0.590825	0.778024
	Interval43	0.566328	0.537866	1.05292	0.292379	1.76179	0.613921	5.05584	0.610027	0.778024
	Interval8	0.756471	0.804978	0.939742	0.34735	2.13074	0.439866	10.3215	1.22024	0.778024
	Interval42	0.223916	0.251375	0.890767	0.373054	1.25097	0.764313	2.04748	0.113328	0.778024
	Interval21	-0.63822	0.721606	-0.884444	0.376456	0.528232	0.128405	2.17304	0.928041	0.778024
	Interval35	-0.75082	0.852946	-0.880267	0.378715	0.471979	0.0886912	2.51169	1.29125	0.778024
	Interval36	0.139501	0.161308	0.864808	0.387144	1.1497	0.838062	1.57722	0.0454807	0.778024
	Interval12	0.578442	0.682759	0.847213	0.396877	1.78326	0.467776	6.79814	0.800755	0.778024
	Interval41	0.232644	0.279158	0.833375	0.404634	1.26193	0.730149	2.18102	0.132052	0.778024
	Interval11	-0.939172	1.13273	-0.829126	0.407033	0.390951	0.0424549	3.60013	2.16511	0.778024
	Interval16	0.847202	1.09732	0.772063	0.440077	2.33311	0.271566	20.0445	1.92187	0.778024
	Interval4	0.594608	0.824492	0.721181	0.470798	1.81232	0.360092	9.12131	1.03335	0.778024
	Interval39	-0.239725	0.338983	-0.707189	0.479449	0.786844	0.404893	1.5291	0.172378	0.778024
	Interval34	-0.128934	0.194185	-0.663975	0.506706	0.879032	0.600774	1.28617	0.0543318	0.778024
	Interval44	-0.536361	0.584917	-0.916986	0.524021	0.584873	0.185853	1.84057	0.629811	0.778024
	Interval10	0.437961	0.699202	0.626373	0.53107	1.54954	0.393579	6.10066	0.680693	0.778024
	Interval13	0.247938	0.431117	0.575106	0.565219	1.28138	0.550432	2.98299	0.247335	0.778024
	Interval7	-0.310325	0.554143	-0.560009	0.575473	0.733208	0.247475	2.17232	0.403376	0.778024
	Interval15	0.596817	1.13299	0.526763	0.598358	1.81633	0.19714	16.7345	1.63985	0.778024
	Interval33	-0.126993	0.241338	-0.526203	0.598747	0.88074	0.548803	1.41344	0.0743712	0.778024
	Interval19	0.592199	1.13299	0.522685	0.601193	1.80796	0.19623	16.6576	1.63438	0.778024
	Interval18	0.410295	0.852955	0.481028	0.630497	1.50726	0.28323	8.02118	0.895873	0.792629
	Interval37	-0.172539	0.450032	-0.383393	0.701428	0.841526	0.348331	2.03302	0.232298	0.853005
	Interval38	0.261256	0.721607	0.362047	0.717317	1.29856	0.315658	5.34203	0.588972	0.853005
	Interval24	-0.158575	0.533246	-0.297376	0.76618	0.853359	0.300071	2.42684	0.309497	0.887179
	Interval22	0.242465	1.20119	0.201855	0.84003	1.27439	0.121012	13.4206	1.50164	0.947692
	Interval23	-0.0248185	0.186219	-0.133276	0.893975	0.975487	0.677186	1.40519	0.0352936	0.951971
	Interval20	-0.182432	1.38522	-0.131699	0.895222	0.833242	0.0551632	12.5861	1.95211	0.951971
	Interval17	0.0864892	0.753953	0.114714	0.908672	1.09034	0.248762	4.77903	0.575926	0.951971
	Interval27	0.0328996	0.380406	0.0864856	0.93108	1.03345	0.490321	2.17819	0.145791	0.952753
	Interval30	0.0157709	0.36872	0.042772	0.965883	1.0159	0.49316	2.09272	0.136203	0.9659

## Sheet: Pp vs Mir on CHX
	Term	Estimate	Std. Error	z value	Pr(>|z|)	Odds Ratio (Pp over Mir)	95% Odds Ratio CI		Variance + Bias^2	Benjamini & Hochberg Corrected p-values
	Species : Pp	-0.476001	0.0842131	-5.65234	1.58278e-08	0.621263	0.526734	0.732755
Difference Between Intervals Over Both Species (Main Effect)	Interval1	0.719523	0.194362	3.70198	0.000213927		1.40295	3.00559
	Interval2	0.280627	0.238139	1.17842	0.23863		0.83017	2.11146
	Interval3	0.917561	0.178231	5.14814	2.63076e-07		1.76514	3.54981
	Interval4	-0.395988	0.331257	-1.19541	0.231926		0.351603	1.28824
	Interval5	0.42994	0.221661	1.93963	0.052425		0.995494	2.37357
	Interval6	0.563106	0.208456	2.70132	0.00690657		1.16711	2.64238
	Interval7	0.200833	0.25173	0.79781	0.424981		0.746352	2.00216
	Interval8	-0.466453	0.350746	-1.32989	0.183555		0.3154	1.24733
	Interval9	0.281497	0.23814	1.18206	0.23718		0.83089	2.1133
	Interval10	-0.776253	0.403434	-1.92411	0.0543406		0.208674	1.01458
	Interval11	-1.14177	0.492243	-2.31952	0.0203671		0.121655	0.837806
	Interval12	-0.775394	0.403435	-1.92198	0.0546083		0.208852	1.01546
	Interval13	0.978489	0.17838	5.48542	4.12483e-08		1.87548	3.77392
	Interval14	0.283311	0.244703	1.15778	0.246956		0.82176	2.14455
	Interval15	-0.941908	0.441109	-2.13532	0.0327353		0.164231	0.925581
	Interval16	0.286735	0.23815	1.20401	0.228584		0.835239	2.12444
	Interval17	-0.200244	0.300752	-0.665811	0.505532		0.453973	1.47584
	Interval18	-1.70906	0.693498	-2.4644	0.0137243		0.0464996	0.704829
	Interval19	-1.14091	0.492244	-2.31777	0.0204617		0.12176	0.838525
	Interval20	-1.13833	0.492246	-2.31253	0.0207485		0.122073	0.840691
	Interval21	-1.7082	0.693498	-2.46316	0.0137718		0.0465394	0.705434
	Interval22	-1.71162	0.693496	-2.46811	0.0135829		0.0463805	0.703019
	Interval23	1.77737	0.12634	14.0682	5.95846e-45		4.617	7.57609
	Interval24	-0.293599	0.314845	-0.932521	0.351067		0.402245	1.38195
	Interval25	0.477118	0.216954	2.19917	0.0278661		1.05326	2.46538
	Interval26	1.33797	0.153779	8.70061	3.3011e-18		2.81951	5.15196
	Interval27	-0.439215	0.350779	-1.25211	0.210529		0.324087	1.28186
	Interval28	0.221629	0.244595	0.906106	0.36488		0.772767	2.01584
	Interval29	0.374072	0.232279	1.61044	0.107301		0.922014	2.29181
	Interval30	0.10379	0.268177	0.387023	0.69874		0.655842	1.87652
	Interval31	-0.505966	0.350698	-1.44274	0.149094		0.303208	1.1989
	Interval32	1.08229	0.166009	6.5195	7.05411e-11		2.1317	4.08643
	Interval33	1.56441	0.137385	11.387	4.85344e-30		3.65148	6.25688
	Interval34	1.36954	0.147354	9.29424	1.48259e-20		2.94683	5.25067
	Interval35	-1.38864	0.567317	-2.44773	0.014376		0.0820376	0.758284
	Interval36	2.53544	0.101419	24.9996	6.17261e-138		10.3466	15.3977
	Interval37	-0.347521	0.331318	-1.0489	0.294223		0.36902	1.35238
	Interval38	-1.38864	0.567317	-2.44773	0.014376		0.0820376	0.758284
	Interval39	0.645038	0.200991	3.20929	0.00133065		1.28543	2.82634
	Interval40	-0.505966	0.350698	-1.44274	0.149094		0.303208	1.1989
	Interval41	0.396345	0.226756	1.74789	0.0804823		0.953042	2.31819
	Interval42	0.563106	0.208456	2.70132	0.00690657		1.16711	2.64238
	Interval43	-0.295323	0.314842	-0.938001	0.348244		0.401554	1.37957
Difference In Each Interval Between the Species (Interaction effect)	Interval26	1.06626	0.194264	5.48868	4.04944e-08	2.90448	1.98476	4.2504	1.17464	0
	Interval42	0.939765	0.262954	3.57387	0.000351744	2.55938	1.52863	4.28515	0.952303	0.0088
	Interval34	0.673398	0.199003	3.38386	0.000714736	1.96089	1.32757	2.89633	0.493067	0.0102667
	Interval25	0.893773	0.276598	3.2313	0.00123227	2.44433	1.4214	4.20345	0.875337	0.0132
	Interval41	0.860779	0.287873	2.99014	0.00278853	2.365	1.34521	4.1579	0.823811	0.02464
	Interval23	0.430404	0.177941	2.4188	0.0155716	1.53788	1.08507	2.17966	0.21691	0.1144
	Interval6	-1.04918	0.455487	-2.30342	0.0212553	0.350226	0.143427	0.855198	1.30824	0.11715
	Interval1	-0.937319	0.402516	-2.32865	0.0198775	0.391677	0.177951	0.862096	1.04059	0.11715
	Interval3	-0.752151	0.340933	-2.20616	0.027373	0.471352	0.241623	0.919502	0.681966	0.133956
	Interval9	-1.13563	0.547967	-2.07245	0.0382237	0.321219	0.109739	0.940242	1.58993	0.137077
	Interval16	-1.1316	0.547976	-2.06506	0.0389173	0.322515	0.11018	0.944055	1.58081	0.137077
	Interval13	-0.663454	0.323922	-2.04819	0.0405411	0.515069	0.272984	0.971836	0.545097	0.137077
	Interval27	0.889041	0.433167	2.05242	0.0401285	2.4328	1.04085	5.68623	0.978028	0.137077
	Interval36	0.281462	0.146201	1.92518	0.0542075	1.32507	0.994922	1.76476	0.100595	0.170343
	Interval5	-0.77091	0.436374	-1.76663	0.0772907	0.462592	0.196675	1.08805	0.784725	0.226747
	Interval2	-0.770963	0.46981	-1.64101	0.100795	0.462567	0.184189	1.16168	0.815106	0.2772
	Interval31	0.686452	0.455487	1.50707	0.131792	1.98665	0.813587	4.8511	0.678684	0.341129
	Interval7	-0.681903	0.47685	-1.43002	0.152712	0.505654	0.198587	1.28753	0.692378	0.373267
	Interval29	0.432023	0.316837	1.36355	0.17271	1.54037	0.827805	2.8663	0.287029	0.399937
	Interval44	-0.735387	0.497021	-1.47959	0.267033	0.47932	0.180947	1.26969	0.787824	0.5434
	Interval17	-0.635273	0.577946	-1.09919	0.271685	0.529791	0.170666	1.64461	0.737592	0.5434
	Interval30	0.402671	0.364685	1.10416	0.269523	1.49582	0.7319	3.05706	0.295139	0.5434
	Interval38	0.738338	0.719501	1.02618	0.304806	2.09245	0.510746	8.5725	1.06282	0.559533
	Interval18	0.872817	0.85118	1.02542	0.305165	2.39364	0.451357	12.694	1.48632	0.559533
	Interval43	0.378222	0.436837	0.86582	0.386589	1.45969	0.620036	3.43639	0.333878	0.680416
	Interval11	-0.725789	1.09567	-0.662414	0.507706	0.483943	0.0565117	4.14428	1.72727	0.721316
	Interval20	-0.724964	1.09569	-0.661652	0.508194	0.484342	0.0565567	4.14782	1.72611	0.721316
	Interval33	-0.152203	0.215735	-0.705508	0.480494	0.858814	0.562681	1.3108	0.0697071	0.721316
	Interval37	0.341082	0.458422	0.744035	0.456856	1.40647	0.572681	3.4542	0.326488	0.721316
	Interval12	0.429435	0.551403	0.778803	0.436096	1.53639	0.52136	4.52757	0.488459	0.721316
	Interval21	0.60663	0.896683	0.676527	0.498706	1.83424	0.316362	10.6348	1.17204	0.721316
	Interval10	0.286626	0.571639	0.501411	0.616082	1.33193	0.434402	4.08384	0.408925	0.847137
	Interval4	-0.260712	0.552775	-0.471643	0.637182	0.770502	0.260761	2.2767	0.373531	0.8496
	Interval32	-0.104414	0.263132	-0.396813	0.691505	0.900852	0.537862	1.50882	0.0801411	0.894882
	Interval22	0.288633	0.981388	0.294107	0.768676	1.3346	0.194974	9.13537	1.04643	0.966366
	Interval39	-0.0794651	0.313619	-0.253381	0.799974	0.92361	0.499495	1.70784	0.104671	0.977778
	Interval15	-0.152551	0.719502	-0.212023	0.832089	0.858515	0.209554	3.51723	0.540955	0.9804
	Interval14	-0.0403503	0.371792	-0.108529	0.913576	0.960453	0.463447	1.99045	0.139858	0.9804
	Interval24	-0.0373174	0.490329	-0.0761067	0.939334	0.96337	0.368482	2.51866	0.241815	0.9804
	Interval35	-0.0357709	0.896679	-0.0398926	0.968179	0.964861	0.166417	5.59414	0.805312	0.9804
	Interval8	-0.0131847	0.535762	-0.0246092	0.980367	0.986902	0.345322	2.82049	0.287215	0.9804
	Interval40	0.0198956	0.535727	0.0371376	0.970375	1.02009	0.356961	2.91515	0.287399	0.9804
	Interval28	0.0277692	0.371727	0.0747032	0.940451	1.02816	0.49618	2.1305	0.138952	0.9804
	Interval19	0.0450245	0.751937	0.059878	0.952253	1.04605	0.239603	4.56684	0.567436	0.9804
