# Supplementary material for: Recombination Modulates How Selection Affects Linked Sites in Drosophila
Source: PubMed Central journal article supplement (PMC3496668; doi:10.1371/journal.pbio.1001422), 2012-11-13
Supplement: pbio.1001422.s015.pdf [file pbio.1001422.s015.pdf]

|                                            | <u><i>D. pseudoobscura</i></u> | <u><i>D. pseudoobscura</i></u> | <u><i>D. miranda</i></u> |
|--------------------------------------------|--------------------------------|--------------------------------|--------------------------|
| Chromosome 2                               | Pikes Peak                     | Flagstaff                      |                          |
| Max recombination rate (Kosambi cM/Mb)     | 30.810                         | 17                             | 23.960                   |
| Average recombination rate (Kosambi cM/Mb) | 4.054                          | 3.761                          | 5.390                    |
| Crossovers per individual                  | 1.053/1/1                      | 1.063/1/1                      | 1.401/1/1                |
| Total Mb covered                           | 30.600                         | 30.119                         | 30.116                   |
| % of chromosome                            | 99.4%                          | 97.8%                          | 97.8%                    |
| <br>                                       |                                |                                |                          |
| <u>XL</u>                                  |                                |                                |                          |
| Max recombination rate (Kosambi cM/Mb)     | 15.76                          | 6.66                           | 14.25                    |
| Average recombination rate (Kosambi cM/Mb) | 3.937                          | 4.18                           | 5.435                    |
| Crossovers per individual                  | 0.229/0/0                      | 0.496/0/0                      | 0.265/0/0                |
| Total Mb covered                           | 4.641                          | 12.048                         | 4.344                    |
| % of chromosome arm                        | 22.8                           | 59.3                           | 21.4                     |
| <br>                                       |                                |                                |                          |
| <u>XR</u>                                  |                                |                                |                          |
| Max recombination rate (Kosambi cM/Mb)     | 25.16                          | 21.54                          | 32.33                    |
| Average recombination rate (Kosambi cM/Mb) | 4.201                          | 3.595                          | 5.5                      |
| Crossovers per individual                  | 1.0601/1/1                     | 1.008/1/1                      | 1.540/1/1                |
| Total Mb covered                           | 24.863                         | 26.072                         | 20.656                   |
| % of chromosome arm                        | 85.3                           | 89.4                           | 70.8                     |
