# Supplementary material for: Recombination Modulates How Selection Affects Linked Sites in Drosophila
Source: PLOS journal article supplement (doi:10.1371/journal.pbio.1001422), 2012-11-13
Supplement: S21 (10.1371/journal.pbio.1001422.s021) [file journal.pbio.1001422.s021]

| <b>Strain</b>           | <b>Collection locality and date</b>                  | <b>Species</b>          | <b>bp</b>        | <b>Reads</b>  | <b>Type of Sequencing</b>  |
|-------------------------|------------------------------------------------------|-------------------------|------------------|---------------|----------------------------|
| Mather 32               | Mather, CA; 1997                                     | <i>D. pseudoobscura</i> | 8,010,565,950    | 106,807,546   | Illumina-75bp              |
| MSH24                   | Mount St. Helena, CA; 1997                           | <i>D. pseudoobscura</i> | 7,699,081,950    | 102,654,426   | Illumina-75bp              |
| MSH9                    | Mount St. Helena, CA                                 | <i>D. pseudoobscura</i> | 8,484,305,700    | 113,124,076   | Illumina-75bp              |
| Tree Line               | Mather, CA; 1959                                     | <i>D. pseudoobscura</i> | 6,864,302,025    | 91,524,027    | Illumina-75bp              |
| Pikes Peak 1134         | Bosque del Apache National Wildlife Refuge, NM; 2006 | <i>D. pseudoobscura</i> | 7,868,843,700    | 104,917,916   | Illumina-75bp              |
| Pikes Peak 1137         | Bosque del Apache National Wildlife Refuge, NM; 2006 | <i>D. pseudoobscura</i> | 9,080,119,350    | 121,068,258   | Illumina-75bp              |
|                         |                                                      |                         | 2,412,073,560    | 31,737,810    | Illumina-76bp mate-paired* |
| American Fork Canyon 12 | American Fork Canyon, UT; 1997                       | <i>D. pseudoobscura</i> | 8,296,150,350    | 110,615,338   | Illumina-75bp              |
| Flagstaff18             | Flagstaff, AZ; 1997                                  | <i>D. pseudoobscura</i> | 7,231,357,875    | 96,418,105    | Illumina-75bp              |
| Flagstaff16             | Flagstaff, AZ; 1997                                  | <i>D. pseudoobscura</i> | 3,811,124,520    | 108,889,272   | Illumina-35bp              |
|                         |                                                      |                         | 2,470,869,744    | 32,511,444    | Illumina-76bp mate-paired* |
| Flagstaff14             | Flagstaff, AZ; 1997                                  | <i>D. pseudoobscura</i> | 3,317,092,975    | 94,774,085    | Illumina-35bp              |
| MV2-25                  | Genome reference                                     | <i>D. pseudoobscura</i> | —                | —             | —                          |
| BogWer                  |                                                      | <i>D. ps. bogotana</i>  | 1,280,008,872 PE | 35,555,802 PE | Illumina 36 bp PE*         |
|                         |                                                      |                         | 2,690,495,684 PE | 35,401,259 PE | Illumina 76 bp PE*         |
| TORO                    |                                                      | <i>D. ps. bogotana</i>  | 4,897,006,724 PE | 64,434,299 PE | Illumina 76bp PE*          |

|         |                                         |                      |                                   |                             |                                    |
|---------|-----------------------------------------|----------------------|-----------------------------------|-----------------------------|------------------------------------|
| MSH22   | Mount St. Helena, CA;<br>1997           | <i>D. miranda</i>    | 767,944,812 PE                    | 10,104,537 PE               | Illumina-75bp PE*                  |
| SP138   |                                         | <i>D. miranda</i>    | 1,901,271,480 PE                  | 25,016,730 PE               | Illumina-76bp PE*                  |
| MAO3.5  |                                         | <i>D. miranda</i>    | 1,213,232,384 PE                  | 15,963,584 PE               | Illumina-76bp PE*                  |
| MSH1993 | Mount St. Helena, CA;<br>1993           | <i>D. persimilis</i> | 1,265,090,680 PE                  | 36,145,448 PE               | Illumina-35bp PE*                  |
|         |                                         |                      | 2,544,881,775 PE                  | 33,931,757 PE               | Illumina-75bp PE*                  |
| MSH3    | Genome reference                        | <i>D. persimilis</i> | —                                 | —                           | —                                  |
| SCI     | Santa Cruz Island, CA<br>SexRatio; 2004 | <i>D. persimilis</i> | 5,224,672,900 PE                  | 104,493,458 PE              | Illumina-50bp<br>HiSeq PE*         |
| Lab 3   | <i>D. lowei</i>                         | Lab3Lowe             | 8,878,213,904<br>1,164,178,184 PE | 116,818,604<br>7,659,067 PE | Illumina-75bp<br>Illumina-75bp PE* |
