# Supplementary material for: Recombination Modulates How Selection Affects Linked Sites in Drosophila
Source: PLOS journal article supplement (doi:10.1371/journal.pbio.1001422), 2012-11-13
Supplement: S24 (10.1371/journal.pbio.1001422.s024) [file journal.pbio.1001422.s024]

**A) *D. miranda* - Four-fold degenerate sites for unpreferred codons, XL chromosome arm:**

Response: Within *D. miranda* diversity

---

|                            | Df       | Deviance      | Resid.Df  | Resid. Dev     | F             | Pr(>F)         |
|----------------------------|----------|---------------|-----------|----------------|---------------|----------------|
| NULL                       |          |               | 17        | 25.3338        |               |                |
| Gene Density               | 1        | 0.7578        | 16        | 24.5760        | 0.9615        | 0.35242        |
| Mutation                   | 1        | 1.0581        | 15        | 23.5179        | 1.3425        | 0.27641        |
| <b>Recombination</b>       | <b>1</b> | <b>2.0402</b> | <b>14</b> | <b>21.4778</b> | <b>2.5886</b> | <b>0.14209</b> |
| GC                         | 1        | 0.0573        | 13        | 21.4205        | 0.0727        | 0.79354        |
| Gene Density*Mutation      | 1        | 1.3210        | 12        | 20.0994        | 1.6762        | 0.22766        |
| Gene Density*Recombination | 1        | 7.2513        | 11        | 12.8481        | 9.2008        | 0.01417 *      |
| GC*Mutation                | 1        | 0.6616        | 10        | 12.1865        | 0.8394        | 0.38345        |
| GC*Recombination           | 1        | 5.8711        | 9         | 6.3154         | 7.4495        | 0.02325 *      |

**B) *D. miranda* - Four-fold degenerate sites for unpreferred codons, XL chromosome arm:**

Response: *D. pseudoobscura*- *D. miranda* divergence

---

|                            | Df       | Deviance      | Resid.Df  | Resid. Dev    | F             | Pr(>F)         |
|----------------------------|----------|---------------|-----------|---------------|---------------|----------------|
| NULL                       |          |               | 17        | 41.125        |               |                |
| Gene Density               | 1        | 12.6362       | 16        | 28.489        | 6.7677        | 0.02867 *      |
| Mutation                   | 1        | 0.4304        | 15        | 28.058        | 0.2305        | 0.64258        |
| <b>Recombination</b>       | <b>1</b> | <b>1.4995</b> | <b>14</b> | <b>26.559</b> | <b>0.8031</b> | <b>0.39351</b> |
| GC                         | 1        | 10.9844       | 13        | 15.574        | 5.8831        | 0.03826 *      |
| Gene Density*Mutation      | 1        | 0.7721        | 12        | 14.802        | 0.4135        | 0.53623        |
| Gene Density*Recombination | 1        | 0.0077        | 11        | 14.795        | 0.0041        | 0.95034        |
| GC*Mutation                | 1        | 0.0018        | 10        | 14.793        | 0.0010        | 0.97605        |
| GC*Recombination           | 1        | 0.3844        | 9         | 14.408        | 0.2059        | 0.66074        |

**C) *D. pseudoobscura* – Pikes Peak- Four-fold degenerate sites for unpreferred codons, XL chromosome arm:**

Response: Within *D. pseudoobscura* diversity

---

|                            | Df       | Deviance       | Resid.Df  | Resid. Dev    | F              | Pr(>F)            |
|----------------------------|----------|----------------|-----------|---------------|----------------|-------------------|
| NULL                       |          |                | 18        | 42.276        |                |                   |
| Gene Density               | 1        | 8.0291         | 17        | 34.247        | 10.7668        | 0.0082711*        |
| Mutation                   | 1        | 0.4097         | 16        | 33.837        | 0.5494         | 0.4755915         |
| <b>Recombination</b>       | <b>1</b> | <b>19.2485</b> | <b>15</b> | <b>14.588</b> | <b>25.8116</b> | <b>0.0004774*</b> |
| GC                         | 1        | 1.5211         | 14        | 13.067        | 2.0397         | 0.1837143         |
| Gene Density*Mutation      | 1        | 3.1366         | 13        | 9.931         | 4.2062         | 0.0674077         |
| Gene Density*Recombination | 1        | 1.5680         | 12        | 8.363         | 2.1026         | 0.1776799         |
| GC*Mutation                | 1        | 0.6674         | 11        | 7.695         | 0.8949         | 0.3664408         |
| GC*Recombination           | 1        | 0.2394         | 10        | 7.456         | 0.3210         | 0.5835086         |

**D) *D. pseudoobscura* – Pikes Peak- Four-fold degenerate sites for unpreferred codons, XL chromosome arm:**

Response: *D. pseudoobscura*- *D. miranda* divergence

---

|                            | Df       | Deviance      | Resid.Df  | Resid. Dev    | F             | Pr(>F)         |
|----------------------------|----------|---------------|-----------|---------------|---------------|----------------|
| NULL                       |          |               | 18        | 37.157        |               |                |
| Gene Density               | 1        | 8.1702        | 17        | 28.987        | 5.8387        | 0.03629 *      |
| Mutation                   | 1        | 0.0643        | 16        | 28.922        | 0.0459        | 0.83458        |
| <b>Recombination</b>       | <b>1</b> | <b>2.4114</b> | <b>15</b> | <b>26.511</b> | <b>1.7233</b> | <b>0.21860</b> |
| GC                         | 1        | 11.0000       | 14        | 15.511        | 7.8609        | 0.01867 *      |
| Gene Density*Mutation      | 1        | 0.6197        | 13        | 14.891        | 0.4429        | 0.52079        |
| Gene Density*Recombination | 1        | 0.0485        | 12        | 14.843        | 0.0347        | 0.85605        |
| GC*Mutation                | 1        | 0.1080        | 11        | 14.735        | 0.0772        | 0.78677        |
| GC*Recombination           | 1        | 0.6295        | 10        | 14.105        | 0.4499        | 0.51759        |
